# Supplementary material for: A longitudinal study of facial growth of Southern Chinese in Hong Kong: Comprehensive photogrammetric analyses
Source: PLoS One. 2017 Oct 20;12(10):e0186598. doi: 10.1371/journal.pone.0186598 (PMC5650157; doi:10.1371/journal.pone.0186598)
Supplement: S6 Table — (XLSX) [file pone.0186598.s006.xlsx]

## Sheet: Sheet1
id	gender	age_level	group	Mandible_face_width_index	Intercanthal_index	Orbital_protrusion_index	Orbital_width_index	Eye_fissure_index	Nostril_nose_width_index	Upper_vermilion_contour_index	Mouth_width_contour_index	Lower_vermilion_contour_index	Philtrum_mouth_width_index	Vermilion_arc_index	Biocular_face_width_index	Intercanthal_nasal_width_index	Intercanthal_mouth_width_index	Nose_face_width_index	Nose_mouth_width_index	Mouth_face_width_index
012	f	12	f_12	72.5406	43.9311	99.8092	66.8192	33.1898	56.7871	94.4616	95.9719	84.7609	22.4706	111.445	61.1228	96.1476	80.0553	27.9278	83.2629	33.5417
019	f	12	f_12	62.067	38.6788	99.5264	79.7466	30.8398	56.9973	87.8033	96.1188	85.6567	26.26	102.506	64.5171	92.3621	78.6239	27.0181	85.1258	31.739
021	f	12	f_12	68.02	45.6751	99.167	61.4709	35.1331	60.138	91.41	96.2407	85.2853	28.2557	107.181	56.86	110.929	87.3006	23.4121	78.6993	29.7488
022	f	12	f_12	81.6084	41.6982	100.255	70.0765	31.5619	64.2919	75.9778	93.1443	94.0353	24.8816	80.7972	59.6124	92.3086	79.5782	26.9285	86.2089	31.2363
031	f	12	f_12	71.4369	41.6508	99.6854	69.4218	35.2312	52.9063	91.2694	96.1681	89.0571	27.7383	102.484	62.1076	99.3145	83.9264	26.0469	84.5056	30.8226
032	f	12	f_12	74.7839	41.3883	100.042	71.8687	39.0074	52.1228	89.4076	95.8757	85.5184	27.8706	104.548	60.4292	88.7959	92.8317	28.1664	104.545	26.9419
033	f	12	f_12	64.1372	40.7443	99.8717	73.4111	37.6058	57.6274	84.1765	95.6321	81.4029	25.0673	103.407	62.8267	103.601	87.1526	24.7085	84.1232	29.3718
041	f	12	f_12	70.996	41.3968	100.021	71.4217	34.6582	58.8267	88.3324	95.7154	83.4549	29.29	105.844	60.2091	92.3759	90.5344	26.9818	98.0065	27.5306
048	f	12	f_12	65.0544	39.0528	100.199	78.7303	36.0617	55.7522	95.8776	95.0483	86.9218	33.9641	110.303	64.4333	96.562	78.0581	26.0589	80.8373	32.2363
056	f	12	f_12	77.6916	44.8392	99.9945	59.7402	40.1173	63.8974	83.805	95.3686	90.7897	22.0606	92.3068	60.706	98.2163	97.6816	27.7144	99.4556	27.8661
060	f	12	f_12	68.2545	40.637	100.001	72.0921	33.6799	51.2386	93.1492	96.0211	85.4699	25.6813	108.985	68.1641	102.942	95.6038	26.9082	92.8716	28.9735
064	f	12	f_12	73.4718	37.8477	99.8571	83.9128	41.6243	52.9768	96.4869	95.6012	86.8373	24.0995	111.112	70.0058	93.7067	73.2876	28.275	78.2096	36.1529
066	f	12	f_12	70.6444	39.8944	99.8545	77.7189	32.8831	60.4866	91.9357	96.8233	90.8802	20.9681	101.161	61.6007	96.0468	74.9781	25.5867	78.0642	32.7766
068	f	12	f_12	73.1282	41.3885	99.7988	67.936	33.502	56.7833	91.1782	95.8778	92.6585	31.6425	98.4024	59.551	89.9736	75.5351	27.3939	83.9525	32.6302
077	f	12	f_12	76.8157	43.6373	100.112	63.0405	35.1649	58.24	92.813	96.4678	91.1987	22.9959	101.77	56.7271	87.8452	71.2518	28.1793	81.1107	34.7418
079	f	12	f_12	68.2492	41.6345	100.051	70.0893	34.3696	59.1901	91.4614	96.3464	86.3501	26.0007	105.919	62.2898	97.497	85.4715	26.5998	87.6659	30.3423
081	f	12	f_12	75.8301	42.8566	100.095	68.3476	34.081	57.4098	91.3589	96.2284	91.4917	22.4591	99.8549	61.2256	109.451	89.9335	23.9734	82.1677	29.1762
082	f	12	f_12	67.4881	38.9962	99.6194	81.7231	37.3882	58.2253	93.2147	95.9178	88.0336	25.8083	105.885	62.2683	88.7342	84.598	27.3652	95.3388	28.7031
083	f	12	f_12	69.843	39.8076	99.7614	73.2148	40.4289	64.014	93.859	96.7038	87.6458	27.8778	107.089	59.621	85.2874	66.2228	27.8279	77.6466	35.8392
088	f	12	f_12	70.5	42.5135	98.7637	70.7576	27.1052	65.9631	92.1366	95.9961	89.6317	28.6021	102.795	61.5349	102.384	83.9289	25.5515	81.9745	31.1701
090	f	12	f_12	75.789	40.1598	100.137	71.5142	31.9616	63.5268	94.4606	94.385	87.6827	24.2631	107.73	67.6577	94.9285	101.754	28.6228	107.19	26.7028
092	f	12	f_12	77.07	43.8979	100.225	63.7921	37.2602	63.5987	94.78	95.4185	89.7749	22.0476	105.575	65.9582	108.332	88.9492	26.7274	82.1081	32.5514
093	f	12	f_12	69.9867	39.5315	100.035	77.8777	30.5337	56.467	83.8421	95.1176	86.4564	26.0457	96.9761	64.2879	91.7514	93.8958	27.6988	102.337	27.0662
095	f	12	f_12	74.5046	39.0111	100.024	78.2822	40.0905	61.1997	94.6838	96.0714	89.1073	17.523	106.258	60.5492	93.4173	74.8762	25.2853	80.1524	31.5466
097	f	12	f_12	77.7578	39.4643	99.437	77.0067	36.4531	58.3291	93.4268	96.0959	91.9937	24.7085	101.558	60.5419	86.9337	78.827	27.4835	90.6748	30.3099
100	f	12	f_12	69.8459	37.5391	99.3074	85.2028	30.9385	64.4503	89.6094	96.0469	91.5121	21.5367	97.9208	61.7521	92.3065	72.1369	25.1133	78.1493	32.135
107	f	12	f_12	76.5438	42.9322	100.077	65.7453	35.4498	59.5238	89.0572	96.1925	90.9339	24.884	97.9363	63.1122	92.2452	89.7755	29.3733	97.3226	30.1814
108	f	12	f_12	65.4067	43.5199	99.4012	68.5947	36.7856	55.7532	88.8208	95.8728	81.2097	15.5014	109.372	58.0825	92.1309	85.8424	27.4365	93.1744	29.4464
118	f	12	f_12	76.8416	39.1908	100.241	75.0426	34.8834	61.3995	90.5522	96.1195	94.3013	26.4418	96.0243	59.6469	89.4979	72.5276	26.1191	81.0384	32.2306
120	f	12	f_12	72.0705	40.3668	99.7453	75.5375	30.2062	54.609	86.6748	95.793	88.2725	21.7528	98.19	59.6664	92.8851	88.1576	25.9304	94.9104	27.3209
123	f	12	f_12	68.0991	44.99	99.9773	59.8328	35.1955	55.5894	83.0667	95.6933	81.8566	19.6431	101.478	61.7926	102.809	100.116	27.0409	97.3801	27.7684
124	f	12	f_12	80.8614	41.7628	99.9248	70.1194	35.7058	62.4284	90.8901	95.9505	93.9195	23.3179	96.7744	58.1953	87.9171	76.9772	27.6442	87.5566	31.573
125	f	12	f_12	78.7793	37.876	100.082	83.0154	30.7834	65.4775	86.2624	94.7778	89.4917	23.5853	96.3916	61.1231	88.7833	84.8115	26.0758	95.5264	27.297
128	f	12	f_12	72.5517	41.9754	100.437	72.0214	26.1981	61.7574	85.8236	96.0628	83.8593	25.2774	102.342	62.6624	97.5956	83.8763	26.9508	85.9427	31.359
130	f	12	f_12	63.1359	42.3114	99.0533	70.1529	34.1983	58.496	94.5542	96.6759	92.9635	24.9008	101.711	64.4873	98.6602	77.9254	27.656	78.9836	35.0149
131	f	12	f_12	69.2134	40.9224	99.6076	72.2265	41.9172	55.7619	95.1972	96.2198	88.0857	23.0271	108.073	63.3789	93.7208	78.0084	27.6739	83.2349	33.248
132	f	12	f_12	77.423	42.0676	100.154	67.1642	33.2543	57.0405	86.0914	95.2589	93.6143	22.2382	91.9639	63.2227	89.5342	84.3472	29.7052	94.2067	31.5319
133	f	12	f_12	77.81	37.8047	99.4077	80.1092	34.9235	58.8839	93.6086	96.1874	88.1461	22.7303	106.197	59.5812	80.6091	66.3615	27.9428	82.325	33.9421
134	f	12	f_12	77.5682	39.8639	98.9675	78.6743	38.9462	55.8733	91.8272	96.1708	91.447	18.3779	100.416	55.7435	87.1873	71.8006	25.4871	82.3522	30.9489
137	f	12	f_12	75.4731	40.6231	100.158	73.9931	36.7433	60.2281	82.2802	95.0738	87.2399	24.5641	94.3149	60.3367	92.7846	80.7295	26.4167	87.0075	30.3614
138	f	12	f_12	77.1794	43.9359	99.6585	65.2025	34.6844	58.8982	96.2131	95.6311	88.8584	21.1619	108.277	61.9766	102.374	77.1896	26.5985	75.3995	35.2767
141	f	12	f_12	68.7708	40.8542	100.177	72.7324	35.4822	61.3262	89.9396	96.2448	85.6954	25.0993	104.953	57.7755	86.7055	75.6201	27.2229	87.2149	31.2136
142	f	12	f_12	73.484	43.2458	99.839	67.964	29.4592	52.505	95.6115	95.9316	93.1869	19.1672	102.602	58.4929	98.0097	85.3117	25.8094	87.0441	29.6509
143	f	12	f_12	81.7647	39.6039	100.007	79.4369	33.88	61.6823	82.5587	94.6626	93.94	24.7419	87.8845	61.6666	86.9166	73.6589	28.0986	84.7466	33.156
146	f	12	f_12	72.4013	42.8688	100.123	66.3955	32.909	63.7625	93.6141	96.4984	87.8718	19.5378	106.535	60.3873	102.366	75.2472	25.2889	73.5078	34.403
148	f	12	f_12	74.8966	38.2642	99.8999	81.9386	36.1155	61.923	79.877	94.1401	92.6502	19.5077	86.2135	64.2921	88.074	88.585	27.9321	100.58	27.7709
151	f	12	f_12	72.6804	42.6803	99.7056	67.2874	38.2961	55.8667	89.3221	96.245	89.1013	22.6185	100.248	66.7225	100.95	89.8303	28.2093	88.9847	31.7013
152	f	12	f_12	67.3698	39.2663	99.3007	77.6476	32.509	61.3387	93.2786	96.1114	87.4363	22.3639	106.682	62.4473	85.5938	75.2055	28.6478	87.8633	32.605
153	f	12	f_12	83.8785	41.1787	99.7486	70.106	27.4369	58.695	94.8507	96.8397	90.699	27.1713	104.577	55.2057	89.6023	67.9603	25.371	75.8466	33.4504
155	f	12	f_12	79.0861	42.3611	98.9924	71.0082	33.7837	59.5444	91.6991	96.5552	90.7568	21.1491	101.038	62.8144	98.5003	85.7443	27.014	87.0499	31.0328
156	f	12	f_12	74.5576	35.3412	99.9017	91.3938	33.5681	64.2653	84.787	93.9522	95.0505	25.1006	89.2021	58.8157	77.3502	66.2163	26.8728	85.6059	31.3913
158	f	12	f_12	83.0886	43.766	99.8359	67.0874	28.4397	60.3669	92.6394	96.532	92.3328	26.6759	100.332	59.0824	91.4604	77.7138	28.2723	84.97	33.2733
160	f	12	f_12	71.3227	41.8188	99.9217	68.9371	42.7174	66.329	88.2595	96.0151	89.2097	24.0476	98.9348	62.1617	89.5079	84.7366	29.0424	94.6694	30.6777
164	f	12	f_12	71.8316	44.3398	99.5754	62.862	30.5593	64.902	88.3219	96.539	89.9776	22.0835	98.1598	57.2341	110.188	77.7842	23.031	70.5919	32.6255
165	f	12	f_12	78.9212	40.8798	100.104	74.0508	37.0828	58.9691	87.9843	96.1701	91.654	26.2832	95.9961	55.0116	88.242	75.8702	25.4852	85.9798	29.6409
167	f	12	f_12	75.0595	42.0183	99.9686	70.9472	26.8242	68.3483	83.2524	95.7143	87.1094	21.8504	95.5722	65.3231	102.164	99.7881	26.8663	97.6745	27.506
201	f	12	f_12	77.3138	41.3367	99.6829	70.4234	33.8473	71.4327	81.2441	94.6367	91.6674	25.1081	88.6292	59.7288	95.715	79.5187	25.7953	83.0786	31.0492
208	f	12	f_12	71.7008	44.2852	100.233	61.9474	38.001	61.6889	93.7817	95.7935	87.2134	20.8233	107.531	63.5508	102.535	90.555	27.4479	88.3165	31.079
245	f	12	f_12	66.5411	41.7033	99.519	68.3782	39.382	62.9364	85.5878	96.1717	84.2727	27.1767	101.561	66.6664	97.1004	84.6078	28.6323	87.1343	32.86
250	f	12	f_12	68.9939	37.6191	100.073	78.925	37.9666	62.4592	87.8954	95.5314	82.0911	25.3984	107.07	60.5061	91.868	83.6827	24.7767	91.0902	27.2002
255	f	12	f_12	76.8304	39.9342	99.5144	75.4602	32.1774	56.7378	85.8125	95.73	88.2573	27.9603	97.2299	60.5724	91.4415	83.9402	26.4531	91.7967	28.817
264	f	12	f_12	75.344	44.1205	100.078	64.2027	33.0842	65.2832	90.3154	96.3619	90.5646	20.4349	99.7248	59.8767	94.338	74.0771	28.0035	78.5231	35.6627
269	f	12	f_12	72.9922	40.8105	100.087	72.3188	38.429	56.8684	87.4848	95.9755	84.1096	26.3899	104.013	61.1488	90.7769	81.1839	27.4906	89.4323	30.739
275	f	12	f_12	73.2647	44.7971	100.165	61.1207	36.7448	61.2797	88.9335	95.7726	89.5344	27.9727	99.3288	60.9594	96.7398	97.3252	28.2284	100.605	28.0586
277	f	12	f_12	69.6807	40.7381	100.337	73.2744	44.2935	64.4583	87.2544	96.5343	83.2826	19.7042	104.769	63.0511	85.5436	75.8526	30.0266	88.6713	33.8628
283	f	12	f_12	69.2897	45.8029	99.5585	58.4094	40.0698	68.1951	94.8608	95.683	89.1016	21.4712	106.464	60.4484	98.5556	97.6924	28.0929	99.1242	28.3411
294	f	12	f_12	72.3822	45.5678	98.9418	61.567	36.1908	63.2772	85.9748	95.4058	92.3438	24.2459	93.1029	64.2574	96.8444	89.4516	30.2347	92.3663	32.7335
299	f	12	f_12	78.3526	41.5549	99.9303	71.2415	38.1889	64.9901	95.5439	95.786	87.5231	21.3244	109.164	62.0399	102.845	77.7882	25.0675	75.6367	33.142
301	f	12	f_12	74.7612	37.1389	100.258	78.5513	37.0877	62.4721	87.8173	95.6798	91.8729	19.2853	95.5856	63.2772	79.8173	69.1187	29.4428	86.5962	34.0002
304	f	12	f_12	74.7271	42.4883	99.998	67.185	35.0833	57.705	93.2301	96.5089	86.073	23.3926	108.315	59.9883	102.515	79.8446	24.8628	77.8861	31.922
306	f	12	f_12	78.0161	45.2536	99.454	61.7634	36.6076	60.5144	96.1716	96.3074	91.9712	16.9753	104.567	60.0995	106.576	77.3612	25.5192	72.5881	35.1562
322	f	12	f_12	71.028	41.5719	98.7681	73.6709	40.1735	62.7305	91.8616	95.6291	87.587	17.2917	104.88	59.4237	90.3641	77.6597	27.3378	85.9409	31.81
325	f	12	f_12	76.5821	41.8274	99.9623	71.7019	41.8606	64.7437	94.0072	96.5609	90.7989	25.6463	103.533	61.3832	95.3768	78.6801	26.9195	82.494	32.6321
326	f	12	f_12	76.3121	45.3971	100.133	59.3729	38.5646	59.4957	82.7409	95.106	81.8552	26.7426	101.082	63.8631	101.488	103.176	28.5668	101.663	28.0996
329	f	12	f_12	73.0535	43.1724	99.2883	67.0131	40.6973	64.2197	95.338	95.907	87.9562	22.3814	108.393	59.6062	96.6673	84.2478	26.6206	87.1523	30.5449
330	f	12	f_12	76.7828	41.5424	99.928	70.1367	37.1866	65.8963	86.8557	95.9964	90.1483	19.8502	96.3475	56.4706	91.2862	73.356	25.6986	80.3582	31.98
339	f	12	f_12	77.5591	43.184	99.6779	68.526	26.2915	55.5703	92.8542	96.423	88.944	25.6007	104.396	60.3521	95.6361	80.966	27.2517	84.6605	32.1894
344	f	12	f_12	79.6032	42.2378	100.244	69.4567	26.8722	53.343	80.6617	95.6017	85.2065	22.0637	94.6661	59.1652	98.4172	85.4131	25.392	86.7868	29.2579
348	f	12	f_12	73.3302	45.1858	99.7882	61.6281	32.8984	52.0584	89.6048	95.1693	92.9653	22.0633	96.3852	60.0789	103.343	101.888	26.2689	98.5916	26.6442
349	f	12	f_12	75.633	42.5299	100.245	64.1268	38.0753	53.6411	87.019	96.3549	89.6171	25.6806	97.1009	61.6884	96.6657	83.792	27.141	86.6823	31.3109
350	f	12	f_12	77.3345	45.1767	100.157	60.1907	40.3382	54.6473	86.038	96.0792	91.872	23.6376	93.6499	60.9022	102.19	85.3933	26.9239	83.5631	32.2198
352	f	12	f_12	74.5361	38.2365	99.9414	81.0062	39.9223	60.0481	81.7384	95.1033	88.4536	27.2845	92.4082	57.0169	94.5078	83.7964	23.0682	88.6661	26.017
363	f	12	f_12	70.3778	43.3396	99.8266	64.9868	39.2064	61.2813	89.6294	95.98	89.3378	21.4052	100.326	63.5232	102.595	90.1369	26.8345	87.8573	30.5432
365	f	12	f_12	77.2531	41.9808	100.301	70.4056	26.3308	67.8395	83.1468	94.9263	94.9057	31.6397	87.6099	61.9636	95.4625	87.2438	27.2493	91.3906	29.8163
370	f	12	f_12	69.9277	37.9619	99.5214	80.8108	32.0621	57.3793	86.7249	95.509	92.1443	24.4804	94.1186	61.7134	88.636	74.3166	26.4312	83.8447	31.524
377	f	12	f_12	74.9618	39.338	100.229	77.3426	36.3259	60.6323	92.1693	96.1161	87.9306	22.4562	104.82	63.3377	95.6858	76.3057	26.0391	79.7461	32.6525
380	f	12	f_12	77.3827	40.4563	99.8743	76.1635	28.955	64.4294	82.3247	94.0286	92.2452	27.5585	89.2455	60.3546	92.5394	81.5448	26.3858	88.119	29.9433
387	f	12	f_12	73.0699	43.3342	99.8871	62.886	44.1012	60.4154	94.2342	96.3417	84.6042	25.4966	111.382	60.5726	100.003	84.0007	26.2479	83.9982	31.2481
391	f	12	f_12	74.1144	44.4761	99.9866	60.7665	41.6353	61.6685	82.4162	94.662	93.2926	26.0275	88.3416	58.2817	97.2051	83.6078	26.6668	86.0117	31.0036
393	f	12	f_12	72.7219	41.3659	99.2569	73.4602	35.9999	58.2917	90.4055	95.9986	92.1963	19.2998	98.0576	61.0556	92.7271	79.9388	27.2371	86.2086	31.5944
401	f	12	f_12	75.7462	42.292	99.0048	70.7353	35.3757	61.9528	95.3934	96.6176	87.8386	24.4095	108.601	59.1076	87.8507	67.4806	28.4549	76.8128	37.0444
402	f	12	f_12	73.915	41.023	99.6236	72.5758	34.4406	63.4298	93.7315	96.0927	94.2413	23.625	99.459	62.1713	88.4376	77.0217	28.839	87.0915	33.1135
403	f	12	f_12	81.9097	41.2333	100.219	73.5996	25.9725	52.5882	88.1868	96.3143	90.4711	20.43	97.4751	62.2964	105.364	83.2197	24.3793	78.9834	30.8663
416	f	12	f_12	78.5163	37.6667	99.9276	84.57	35.8108	65.7918	86.288	95.3569	88.6238	25.4469	97.3644	61.4258	84.7534	82.4641	27.2993	97.2988	28.0571
418	f	12	f_12	77.2065	43.9049	99.6358	66.201	32.3185	62.3724	90.7623	95.8872	87.5605	26.8442	103.657	61.6116	111.391	98.6825	24.2843	88.5914	27.4116
425	f	12	f_12	74.0815	44.1636	99.7943	62.9369	29.6551	62.0403	88.5707	96.4358	91.2954	19.7389	97.0155	59.8675	93.3764	82.2308	28.3151	88.0637	32.153
426	f	12	f_12	73.031	41.6726	99.6965	72.1592	29.9855	59.4608	89.338	95.6298	87.5771	22.1712	102.011	61.1754	100.341	87.3005	25.4068	87.0042	29.2018
431	f	12	f_12	74.9965	40.5943	100.007	72.0779	39.8827	61.7948	81.3166	94.1608	91.4889	22.2725	88.8814	59.6533	91.1982	84.2974	26.553	92.4332	28.7266
453	f	12	f_12	72.3422	40.6464	99.6665	72.0932	41.6925	56.7463	90.5461	95.4844	85.8024	28.4504	105.529	57.342	85.783	88.6741	27.1703	103.37	26.2844
454	f	12	f_12	72.8157	41.1989	99.3404	71.3155	31.5666	63.0332	89.0681	96.2518	82.4309	26.6812	108.052	66.2388	96.5495	87.861	28.265	91.001	31.0601
463	f	12	f_12	71.2615	45.8468	99.9853	58.3857	33.2235	54.6585	92.251	96.5459	86.4542	24.7647	106.705	60.6245	110.619	87.7567	25.1262	79.3322	31.6722
466	f	12	f_12	72.7088	43.3607	100.306	62.475	34.4561	66.4024	91.8839	96.5681	91.6944	15.5737	100.207	59.3651	94.2141	81.0692	27.3219	86.0478	31.752
470	f	12	f_12	71.9184	38.1741	99.9989	81.0961	34.9425	58.0744	91.4515	96.3931	85.3133	27.382	107.195	58.0443	86.1144	67.3868	25.7308	78.2527	32.8817
472	f	12	f_12	63.9065	40.8389	100.013	70.859	40.3457	57.6663	94.2381	96.7206	88.9779	23.4702	105.912	61.8336	94.7303	74.3938	26.6569	78.5323	33.9439
473	f	12	f_12	67.1979	41.1748	99.7525	69.4238	41.0665	62.1405	90.8584	96.2806	90.4955	24.3698	100.401	63.801	97.2757	79.7667	27.0056	82.0007	32.9334
486	f	12	f_12	68.0659	40.2568	99.2569	74.5279	39.7332	63.8888	92.5029	95.5805	82.9573	27.2086	111.507	62.6147	96.7352	86.4936	26.0574	89.4127	29.1428
487	f	12	f_12	73.732	43.114	99.9075	63.1555	34.2514	58.7408	91.8171	96.2831	89.7537	19.0982	102.299	61.6544	96.4845	83.6656	27.5502	86.7141	31.7713
490	f	12	f_12	74.091	42.8468	100.177	65.1868	40.0319	63.7184	81.435	94.4867	92.7108	24.5852	87.8377	62.7217	106.216	92.4642	25.3014	87.0527	29.0645
495	f	12	f_12	72.6414	44.5356	99.6069	63.1932	47.8333	56.988	95.2474	96.7686	89.2093	16.0547	106.768	64.8949	98.1642	81.5437	29.4418	83.0687	35.4428
498	f	12	f_12	74.4316	44.256	100.003	61.5192	33.2977	63.6936	94.7937	96.0601	85.1159	22.4628	111.37	63.5437	104.11	86.0228	27.0117	82.6269	32.6912
499	f	12	f_12	77.5911	41.712	99.9366	69.1643	36.5706	64.823	93.0024	96.7413	93.188	16.7917	99.8008	64.4686	99.989	75.4896	26.8941	75.4979	35.6223
500	f	12	f_12	74.2572	41.6993	99.9972	70.4839	37.7732	60.1763	95.9578	94.994	85.0671	14.9349	112.802	66.0237	88.1239	81.691	31.2417	92.7002	33.7019
504	f	12	f_12	74.8622	43.3073	100.048	65.2221	32.2925	64.3878	93.7294	96.1687	88.5823	27.8139	105.81	58.6116	99.2556	78.8752	25.5735	79.4667	32.1814
514	f	12	f_12	72.3987	40.2836	100.165	74.9643	35.9782	66.4236	89.3221	95.5319	89.6145	25.4919	99.6737	64.2329	103.063	86.3284	25.1064	83.763	29.9731
518	f	12	f_12	72.7093	42.233	99.9101	70.9408	33.7513	57.4128	89.5082	96.4019	84.0658	28.7465	106.474	64.3004	92.759	81.1502	29.2759	87.485	33.4639
519	f	12	f_12	76.5487	38.7468	99.6965	76.8103	40.8316	62.2463	95.5628	95.4259	91.4419	20.5877	104.507	63.6245	90.1117	68.3142	27.3576	75.8106	36.0868
520	f	12	f_12	68.9618	43.4104	99.4323	66.1022	33.1959	64.8524	89.5004	95.3235	89.5174	27.6505	99.981	59.0816	90.273	92.2881	28.4112	102.232	27.7908
521	f	12	f_12	73.9013	46.44	99.8065	55.6643	40.057	61.3308	88.2691	95.8998	88.9923	25.1788	99.1873	61.6725	108.635	96.3125	26.3642	88.6572	29.7372
523	f	12	f_12	76.2117	41.9733	100.22	68.4398	33.6402	66.4424	86.1095	94.4306	93.4155	19.1222	92.1791	59.9273	93.82	92.44	26.8103	98.5291	27.2105
537	f	12	f_12	75.0356	44.0755	99.8867	64.277	35.8154	66.6798	94.678	95.9314	85.5886	21.491	110.62	64.7146	109.29	83.4346	26.0986	76.3423	34.1863
547	f	12	f_12	75.1673	40.9484	99.8467	69.0358	42.0099	62.4811	89.0163	96.5507	93.2306	22.2063	95.4796	64.7899	96.2631	77.5368	27.5603	80.5468	34.2166
551	f	12	f_12	73.7205	47.1294	99.7822	55.9955	32.979	63.0459	84.7049	95.9933	86.7999	22.6068	97.5864	60.9658	105.129	97.4104	27.3311	92.6583	29.4967
558	f	12	f_12	71.1384	39.8464	99.334	73.3113	40.8848	57.9565	94.1136	96.1592	86.7527	20.5807	108.485	61.9588	82.8584	79.9996	29.7958	96.5497	30.8606
578	f	12	f_12	71.5752	37.5467	100.133	81.8642	40.0733	67.4613	91.5287	95.9195	84.9829	24.0664	107.702	63.306	84.4201	77.0134	28.156	91.2264	30.8639
580	f	12	f_12	75.3411	40.5188	99.5827	73.4015	34.4128	67.2602	92.3849	96.1499	88.6626	30.6878	104.198	58.1785	87.676	82.7774	26.8867	94.4128	28.4779
585	f	12	f_12	71.7651	45.4969	99.2439	60.5386	39.5193	63.973	96.4619	93.8735	83.3979	19.8525	115.665	61.5049	101.269	82.5801	27.6323	81.5455	33.8857
589	f	12	f_12	77.3269	46.8955	100.198	53.3693	35.3242	61.2942	86.6772	95.7175	86.5671	19.8478	100.127	59.5237	98.0909	95.7769	28.4572	97.641	29.1447
590	f	12	f_12	74.2213	41.2528	100.098	70.7092	34.8884	68.2865	89.8334	95.9891	91.3725	26.8912	98.3156	60.7405	89.7033	85.3996	27.9334	95.2023	29.3411
591	f	12	f_12	76.1798	40.0105	99.7875	75.9566	30.2633	66.0984	94.6064	96.8552	90.9378	18.1281	104.034	59.8118	87.7622	70.4448	27.2681	80.2679	33.9713
593	f	12	f_12	69.6154	42.283	100.252	69.7785	36.058	59.7174	91.9845	96.8199	86.5344	23.8838	106.298	59.0869	88.0909	74.0258	28.3613	84.0335	33.75
595	f	12	f_12	72.5512	44.688	99.6285	61.367	38.7204	60.8494	83.5838	95.9113	83.885	27.9322	99.6409	62.1906	104.909	93.0063	26.4912	88.6539	29.8816
599	f	12	f_12	77.6397	41.5625	99.7771	69.2509	39.8168	59.715	94.1679	96.6956	90.2959	22.1005	104.288	59.1614	90.1662	74.4565	27.2707	82.5769	33.0246
601	f	12	f_12	73.9594	40.6325	99.8485	69.3313	33.2426	67.7177	89.3838	96.7535	88.9336	24.1202	100.506	57.1899	88.1673	69.9147	26.3564	79.2978	33.2372
603	f	12	f_12	70.1909	42.966	100.269	66.291	35.3982	59.1696	88.3586	96.2244	87.2252	21.7901	101.299	58.1348	99.9867	82.3742	24.9815	82.3852	30.3229
607	f	12	f_12	70.7747	39.5625	100.165	76.3625	41.288	65.3115	95.3314	96.2891	88.7795	19.7315	107.38	60.7655	87.8054	68.4614	27.3792	77.9695	35.1152
608	f	12	f_12	71.4806	42.5345	99.5887	67.3282	32.1519	66.442	95.5177	95.493	85.8315	25.4513	111.285	61.3047	90.2971	73.9251	28.8776	81.8687	35.2731
610	f	12	f_12	69.8777	42.2624	99.6779	70.2486	35.7112	67.4735	94.6808	96.2583	87.4419	20.5855	108.279	63.3443	94.9878	76.0639	28.1835	80.0776	35.1952
623	f	12	f_12	73.4821	41.7779	100.159	69.1749	27.7787	65.7678	93.5411	96.1197	87.4856	19.6755	106.922	61.8985	87.2607	81.0913	29.6352	92.9299	31.8899
624	f	12	f_12	72.2737	42.4417	99.8277	67.0807	35.1175	67.4039	93.7914	95.3669	86.7387	18.6419	108.131	62.4164	102.774	83.1282	25.7757	80.8849	31.8672
630	f	12	f_12	67.6828	40.2123	99.2485	75.0486	36.8316	66.3339	89.0747	96.1334	85.778	20.3172	103.843	61.7284	93.5244	81.5282	26.5411	87.1732	30.4464
633	f	12	f_12	82.3961	43.3127	100.284	60.5161	31.9448	53.8413	89.8889	96.7119	91.9041	21.0678	97.8072	59.9347	93.163	72.1006	27.8644	77.3919	36.0043
638	f	12	f_12	69.9313	41.6491	99.008	72.568	36.5259	61.1739	94.3903	96.1488	88.5399	24.9109	106.608	60.537	95.9988	83.0945	26.264	86.5579	30.3427
645	f	12	f_12	69.1096	42.8906	99.7083	65.3607	39.8393	62.9166	87.9355	96.3343	87.8195	20.652	100.132	60.9641	105.071	82.6644	24.8858	78.6745	31.6314
652	f	12	f_12	73.9968	41.5527	99.872	70.5165	34.9196	58.4965	93.0808	96.2042	84.9698	17.2601	109.546	58.1182	96.6363	72.1621	24.9903	74.6739	33.4659
653	f	12	f_12	74.518	39.4272	100.347	76.8862	31.1353	53.1743	91.2709	95.7475	81.3553	22.2356	112.188	58.4078	90.704	80.2801	25.3887	88.5078	28.6853
656	f	12	f_12	74.2549	38.9811	99.8565	81.8204	35.1782	64.5667	82.5034	94.2815	92.9557	19.7914	88.7556	56.3739	85.7532	75.8328	25.6261	88.4315	28.9785
663	f	12	f_12	77.2778	44.7931	99.7494	62.4569	35.4135	60.6485	90.6182	95.7574	91.69	22.7759	98.831	62.0077	109.477	95.1922	25.3708	86.9517	29.178
665	f	12	f_12	73.6933	43.2842	99.7311	64.6515	40.529	66.3688	90.1896	96.2388	90.1847	18.8855	100.005	61.0956	97.561	89.2238	27.1058	91.4544	29.6386
666	f	12	f_12	74.5233	39.3975	100.291	77.48	38.7823	62.1179	89.302	95.7638	86.9744	21.323	102.676	63.7849	96.7493	88.0902	25.974	91.0499	28.5272
012	f	15	f_15	70.9563	44.3649	99.3456	63.6433	34.8464	50.071	94.1989	99.9842	86.8153	26.0827	108.505	60.3376	100.813	85.8085	26.5529	85.1165	31.1959
019	f	15	f_15	67.4314	40.6506	99.6139	73.0371	34.2225	62.1896	94.1232	99.9763	91.1721	23.8264	103.237	61.5719	98.8422	74.1207	25.3225	74.9889	33.7683
021	f	15	f_15	68.3766	44.9755	98.8171	63.2617	32.6327	58.3886	98.2932	99.0949	86.6819	25.805	113.395	57.3537	115.84	79.5008	22.268	68.63	32.4464
022	f	15	f_15	82.7767	42.7773	99.8675	67.0518	27.7764	60.0007	79.1884	96.542	97.2673	19.7862	81.4132	58.8523	93.9594	77.5813	26.794	82.5689	32.4504
031	f	15	f_15	76.122	41.7697	99.3442	70.2837	37.4663	56.7066	95.8183	99.9972	93.9497	24.0513	101.989	61.271	94.8872	75.8451	26.9717	79.9318	33.7434
032	f	15	f_15	78.0116	41.8055	99.5974	70.1182	37.7761	53.7583	90.7138	99.4115	92.6098	24.115	97.9527	61.0135	90.8377	86.4217	28.0797	95.1386	29.5146
033	f	15	f_15	72.822	41.6946	99.612	69.3587	36.8692	61.7295	91.7247	99.8031	93.6526	20.4559	97.9415	61.2305	102.379	85.4614	24.9366	83.4754	29.8729
041	f	15	f_15	76.6206	40.9362	99.468	73.3002	38.5312	64.4129	96.2324	99.9925	89.1602	27.9486	107.932	59.8175	91.2913	90.6254	26.823	99.2705	27.0201
048	f	15	f_15	69.3113	38.9745	99.4145	81.0856	35.7141	52.6685	98.8896	99.0691	87.815	26.0893	112.611	62.8986	97.7886	77.5327	25.0688	79.286	31.6182
056	f	15	f_15	79.5434	44.6779	99.6283	63.4576	38.7701	63.5767	87.8684	99.3472	95.3898	21.2421	92.1151	60.2735	100.419	87.1931	26.8166	86.8293	30.8842
060	f	15	f_15	73.6202	40.1627	99.6661	75.6666	39.6847	56.7466	97.6958	99.8409	91.6169	24.5015	106.635	62.6605	93.737	79.0789	26.8476	84.3625	31.8241
064	f	15	f_15	79.8137	38.6679	99.816	79.2769	35.6705	49.612	89.5563	98.9605	96.6129	23.1086	92.696	66.3895	93.1136	82.4289	27.57	88.5251	31.1437
066	f	15	f_15	75.6696	39.6488	99.3924	76.9939	35.1864	60.621	97.6808	99.9454	92.8672	16.938	105.183	59.7001	93.6412	75.3756	25.2777	80.4941	31.4032
068	f	15	f_15	74.3854	41.3306	99.3851	69.9955	37.9396	53.2507	92.6163	98.9225	96.5113	27.9292	95.9642	57.8792	90.9427	74.1538	26.3042	81.539	32.2597
077	f	15	f_15	73.3481	43.7158	99.4681	64.0063	40.0077	55.5314	92.6567	99.6267	94.4287	23.7792	98.1234	56.2209	87.6671	77.5115	28.0349	88.4157	31.7081
079	f	15	f_15	73.1646	41.3736	99.6481	72.4256	34.1857	61.6669	97.1415	99.9375	91.5925	20.014	106.058	63.5305	94.8973	84.5012	27.6982	89.0449	31.1059
081	f	15	f_15	74.5151	41.2334	99.7136	73.6737	33.463	50.1691	93.7393	99.8754	94.8024	20.4511	98.8786	60.6798	104.274	78.1954	23.9949	74.9907	31.9972
082	f	15	f_15	64.5701	39.7692	99.3079	76.0337	39.2028	66.9064	94.3059	99.7492	91.0938	23.8734	103.526	61.1535	94.1149	81.241	25.841	86.3211	29.9359
083	f	15	f_15	73.5029	39.8195	99.2642	74.2257	41.9484	63.107	95.7712	99.8198	93.9736	23.3731	101.913	61.6467	89.292	70.34	27.4912	78.7753	34.8982
088	f	15	f_15	69.1242	42.6088	98.177	70.2542	28.6858	67.6545	99.7904	99.534	94.6526	21.2624	105.428	63.5736	97.6807	75.3227	27.7311	77.1112	35.9625
090	f	15	f_15	70.6055	39.2932	99.4422	75.5837	36.0228	63.5175	99.2137	99.0362	87.5865	21.4539	113.275	63.9943	92.1953	78.5153	27.274	85.1619	32.0261
092	f	15	f_15	69.5138	43.7566	99.759	65.4572	34.5403	59.8241	96.3522	99.7128	90.304	22.8671	106.698	66.9159	114.876	92.1302	25.4884	80.1994	31.7813
093	f	15	f_15	73.0987	39.8119	99.5297	76.0341	27.3177	52.6987	98.8534	99.8303	92.3657	22.9605	107.024	63.8704	91.5945	75.2727	27.7615	82.1804	33.7812
095	f	15	f_15	71.6067	38.868	99.633	80.0265	38.302	59.2387	86.1508	98.9636	91.5428	20.4979	94.1098	62.1269	94.7656	86.5187	25.4812	91.2976	27.9101
097	f	15	f_15	74.1742	38.7286	99.1129	81.4758	36.7661	61.4406	93.3084	99.9698	92.2983	25.5746	101.094	60.2266	86.7261	81.142	26.8949	93.5612	28.7458
100	f	15	f_15	67.3954	38.8371	99.4898	80.4294	34.3054	62.5297	90.5566	99.0703	91.9935	25.6129	98.4381	61.4133	94.4577	77.8451	25.2506	82.4127	30.6392
107	f	15	f_15	75.5772	43.2057	99.6508	65.9656	39.7413	59.4519	93.4133	99.9627	92.3859	19.0164	101.112	63.1742	89.0051	84.1504	30.6666	94.5456	32.4358
108	f	15	f_15	77.797	43.6152	99.6434	65.7477	23.9104	52.3429	95.3465	99.9256	89.3605	19.5066	106.699	58.2915	93.4624	81.4818	27.2023	87.1813	31.202
118	f	15	f_15	72.1003	39.5884	99.6979	76.9634	40.1079	60.9026	94.8474	99.8179	96.1257	25.3775	98.6702	58.4179	87.4551	76.6679	26.444	87.6654	30.1648
120	f	15	f_15	73.7643	42.1385	99.6758	69.234	32.3348	51.0574	94.8435	99.993	89.1168	21.2464	106.426	58.1334	93.7099	81.2157	26.1408	86.6672	30.1623
123	f	15	f_15	71.008	45.7389	99.5438	58.6888	40.3009	55.0574	87.9923	99.6806	91.4023	21.0914	96.2692	60.7576	106.1	89.1403	26.1922	84.0154	31.1754
124	f	15	f_15	79.188	41.0156	99.0846	72.4688	37.1607	56.5924	97.6688	99.928	96.6687	23.3564	101.035	60.4391	87.3681	76.4928	28.3736	87.5523	32.4076
125	f	15	f_15	77.434	38.8679	99.5392	79.9193	35.0032	57.761	91.5338	99.2912	94.5165	19.8497	96.8442	61.755	88.6412	79.2889	27.0787	89.4492	30.2727
128	f	15	f_15	75.7497	43.462	99.9346	68.2297	32.2925	62.771	94.2695	99.8126	88.0982	21.6025	107.005	61.5253	92.916	78.8053	28.7788	84.8135	33.9319
130	f	15	f_15	71.4252	42.3679	98.9787	64.9309	36.0342	59.7823	97.5197	99.9925	95.2654	26.4642	102.366	63.527	102.164	83.2436	26.345	81.4806	32.3329
131	f	15	f_15	70.7976	41.7795	99.234	72.0759	34.5127	51.1571	99.1083	99.7638	92.8189	25.07	106.776	62.4342	95.8173	76.6669	27.2234	80.0136	34.0235
132	f	15	f_15	74.0499	42.4349	99.4773	69.3636	32.6961	54.6501	90.1463	99.0905	95.5954	26.6699	94.2998	62.2041	94.2247	83.684	28.0142	88.8133	31.5428
133	f	15	f_15	75.9152	38.1969	99.1502	81.0485	34.8053	57.7937	99.6828	98.6628	88.9049	24.6699	112.123	59.8108	80.5021	61.9717	28.3792	76.9814	36.865
134	f	15	f_15	70.6063	40.757	98.6188	74.5675	42.6092	53.4469	96.4919	99.9823	90.8393	17.6464	106.223	55.8778	87.2676	76.2418	26.0969	87.3656	29.8709
137	f	15	f_15	77.5709	41.0444	99.7114	71.1264	36.6454	58.686	90.7005	99.6633	93.5318	23.4847	96.9729	60.5518	95.8955	82.6929	25.9169	86.2323	30.0547
138	f	15	f_15	80.4455	43.8589	99.4043	63.676	34.1941	59.8756	97.5348	99.7162	92.3962	22.9164	105.562	60.1267	97.4159	79.0735	27.0705	81.1711	33.3499
141	f	15	f_15	75.8834	42.7484	99.6648	67.4756	33.9463	62.1617	89.3962	99.8127	91.5452	25.8367	97.6526	57.6923	88.6249	77.7447	27.828	87.7233	31.7225
142	f	15	f_15	73.2319	42.6639	99.1455	70.364	35.1977	53.7073	92.0215	99.8514	90.5501	27.0774	101.625	57.8876	98.9408	92.2344	24.9615	93.2218	26.7765
143	f	15	f_15	78.2876	40.1935	99.3042	73.8446	42.9226	60.4452	84.0172	98.2918	95.8551	27.3106	87.6502	62.6882	91.3357	75.4212	27.5868	82.5758	33.4078
146	f	15	f_15	78.2039	42.728	99.8311	67.8295	37.6536	63.6509	89.8	99.6563	89.5392	17.8272	100.291	59.2487	106.623	87.6752	23.7432	82.2288	28.8745
148	f	15	f_15	69.9098	38.317	99.3827	80.4597	39.3748	62.3151	89.9202	99.7266	91.9872	21.4983	97.753	61.4345	94.2981	83.5448	24.9632	88.5964	28.1763
151	f	15	f_15	72.4138	41.6781	98.9143	70.5466	39.1397	56.5155	95.7078	99.9562	89.0152	21.2976	107.518	65.456	99.6283	87.2929	27.3826	87.6186	31.2521
152	f	15	f_15	72.0006	39.8753	98.8401	77.4741	33.7752	65.9569	97.9985	99.7845	91.9299	20.8372	106.601	61.7017	84.8026	69.5507	29.013	82.0148	35.3753
153	f	15	f_15	80.549	41.613	98.9357	70.0554	44.1502	54.221	97.8892	99.9797	93.4772	25.7552	104.72	56.1711	92.0143	70.4875	25.4031	76.605	33.1612
155	f	15	f_15	78.1071	42.2214	99.3021	70.985	30.6554	69.6294	95.6624	99.9417	90.8978	21.0489	105.242	62.3863	100.999	79.0034	26.0799	78.2222	33.3408
156	f	15	f_15	75.9454	36.0341	99.1948	91.8104	36.6539	65.1738	96.6313	99.8976	96.0619	24.0158	100.593	60.3094	76.7743	61.1989	28.3063	79.7127	35.5104
158	f	15	f_15	80.0592	45.4453	99.2437	61.0511	39.2028	63.3399	93.7378	99.9016	91.0981	18.8135	102.898	59.1609	104.022	89.6098	25.8463	86.145	30.0033
160	f	15	f_15	72.5854	42.5324	99.1108	68.8878	44.3854	66.5452	98.875	99.6839	91.5045	26.0945	108.055	62.3542	87.3713	68.2971	30.354	78.1688	38.8314
164	f	15	f_15	69.4987	43.975	98.9134	63.6673	36.7689	63.4742	95.3845	99.8581	92.7627	21.7089	102.826	57.6931	113.527	79.9903	22.3476	70.4595	31.717
165	f	15	f_15	74.9974	42.2294	99.7367	69.1728	41.7321	61.6301	93.6452	99.7822	91.8153	23.7229	101.993	57.1566	91.8197	76.8237	26.2873	83.668	31.4185
167	f	15	f_15	71.2921	44.8604	99.518	62.181	29.0308	58.6258	97.494	99.2095	86.4244	23.1197	112.808	62.8713	105.511	91.1517	26.7311	86.3907	30.9421
201	f	15	f_15	75.9377	41.8062	99.215	69.8909	37.3066	60.2474	84.1978	98.3576	93.2397	20.2432	90.3026	59.1879	97.7257	80.3317	25.3201	82.2012	30.8025
208	f	15	f_15	66.5973	45.6388	99.7453	59.7901	39.1815	53.8114	90.1132	99.852	89.7789	22.8485	100.372	60.9032	105.901	87.0625	26.2468	82.2115	31.9259
245	f	15	f_15	73.9201	42.3169	99.4718	71.4397	38.0159	57.3875	96.6854	99.8891	93.5838	23.1305	103.314	65.0833	98.7676	75.677	27.8849	76.6212	36.3932
250	f	15	f_15	75.6368	38.4905	99.6505	80.2729	35.8192	63.6746	90.7856	99.9641	86.9401	23.7183	104.423	58.8582	91.0217	82.1082	24.8894	90.2073	27.5914
255	f	15	f_15	67.9459	41.5054	98.9439	72.1755	36.9111	55.2585	87.9325	99.5382	90.0864	26.4888	97.609	59.6683	92.4913	86.0429	26.7761	93.0281	28.7828
264	f	15	f_15	73.4925	44.4417	99.5381	63.8162	38.9506	65.7068	88.5387	97.5664	98.4103	23.5194	89.969	59.7566	97.5682	77.8534	27.2188	79.7939	34.1113
269	f	15	f_15	76.2795	41.2491	99.4327	69.6993	39.6382	62.917	98.6478	99.8801	85.9113	27.5424	114.825	62.5063	91.744	76.8027	28.1035	83.7141	33.5708
275	f	15	f_15	75.994	45.8216	99.8237	58.5294	42.36	63.3195	93.1275	99.9994	95.0101	24.519	98.0185	59.49	100.086	96.2707	27.2359	96.188	28.3153
277	f	15	f_15	79.915	40.8525	99.9826	72.9871	39.1447	73.0736	86.2632	99.5314	94.074	27.5861	91.6972	62.2237	86.5159	81.1932	29.3818	93.8478	31.3079
283	f	15	f_15	71.4548	45.9116	99.1636	60.2672	43.578	63.3038	96.1652	99.9521	87.5003	23.3284	109.903	59.3502	99.5002	94.2083	27.3855	94.6816	28.9238
294	f	15	f_15	75.3876	45.4491	98.4051	62.4991	33.3905	63.0793	94.0649	99.5609	95.6217	26.7534	98.372	62.6748	98.708	90.1967	28.858	91.3773	31.5811
299	f	15	f_15	79.0769	42.1286	99.9178	71.6701	40.5795	61.3992	94.5199	99.9993	93.0837	20.8965	101.543	63.1315	107.87	89.3293	24.656	82.8123	29.7734
301	f	15	f_15	71.708	37.6036	99.7981	82.3628	37.376	59.901	92.098	99.7957	93.9193	19.591	98.0607	61.4857	85.4884	71.8392	27.0455	84.0338	32.1841
304	f	15	f_15	80.3576	42.5085	99.8752	66.6695	33.4445	60.5752	93.8174	99.9772	93.9674	22.7178	99.8403	59.9306	104.249	75.3567	24.4373	72.2855	33.8067
306	f	15	f_15	74.839	44.8054	99.0356	63.1554	34.2356	62.4356	91.8588	99.7948	95.0484	17.6713	96.6442	60.0686	111.122	87.4282	24.2202	78.6777	30.7841
322	f	15	f_15	76.2359	41.9292	98.8153	72.5653	36.2806	57.3792	92.5532	99.8346	94.614	10.4201	97.8219	58.3215	90.8517	75	26.9161	82.5522	32.605
325	f	15	f_15	77.3496	41.4551	99.5605	71.5791	42.8539	56.4299	94.812	99.8657	93.0918	22.8803	101.848	61.1289	97.7897	81.7614	25.9138	83.6095	30.9939
326	f	15	f_15	81.787	45.8215	99.8104	58.9232	36.9731	54.3384	96.3722	99.9969	96.2083	26.0976	100.17	61.949	100.358	78.4237	28.2848	78.1441	36.1957
329	f	15	f_15	68.6225	44.7096	99.4709	64.9151	31.682	57.4012	87.9578	98.6747	92.7193	22.302	94.8645	57.8977	100.27	88.2208	25.8162	87.9833	29.3421
330	f	15	f_15	74.5543	42.5272	99.2689	66.3564	34.6203	62.8654	95.5291	99.9255	91.8692	19.0059	103.984	55.1132	90.586	67.837	25.8739	74.8869	34.5506
339	f	15	f_15	76.4293	42.4987	98.6998	71.3531	35.8516	56.1391	98.2581	99.8476	90.8032	25.7507	108.21	61.1178	92.4738	82.9241	28.0882	89.6731	31.3229
344	f	15	f_15	72.2681	40.5676	99.3169	73.7292	37.8778	54.9376	95.6501	99.9996	90.7034	20.4158	105.454	60.286	92.8819	73.0598	26.3308	78.6588	33.4747
348	f	15	f_15	74.0246	44.3241	99.4501	63.0582	40.6697	51.4345	91.8697	98.9494	97.4116	21.6688	94.3109	60.7223	102.348	104.371	26.2971	101.976	25.7875
349	f	15	f_15	74.6709	42.9597	99.5775	65.5289	45.7577	55.8949	97.3102	99.9387	92.4913	23.708	105.21	62.7485	99.6956	80.9612	27.0389	81.2084	33.2957
350	f	15	f_15	74.7756	45.7959	99.8713	58.5002	45.2918	56.9501	97.2917	99.8771	93.74	17.8601	103.789	61.6814	99.3108	82.7668	28.4436	83.3412	34.1291
352	f	15	f_15	77.8356	38.3691	99.5985	79.5489	37.8931	55.8852	98.0385	99.555	89.5424	22.1995	109.488	58.2488	94.4289	74.5885	23.6681	78.9891	29.9638
363	f	15	f_15	68.3752	44.0681	98.7317	65.6349	37.7636	54.9449	96.0889	99.9434	91.061	24.2698	105.521	63.608	104.464	87.6357	26.833	83.8907	31.9856
365	f	15	f_15	73.5308	41.7519	99.7563	68.6609	29.7312	68.756	91.5781	99.5382	96.9501	25.2698	94.4591	61.0807	92.5381	80.5091	27.5588	87.001	31.6764
370	f	15	f_15	70.9831	37.6507	99.6752	83.7389	29.2818	57.5028	82.8503	98.0101	92.8659	23.9597	89.215	61.9415	87.4914	78.5246	26.6557	89.7512	29.6995
377	f	15	f_15	70.7665	39.8775	99.7073	76.1953	43.0857	60.8082	94.1158	99.9517	88.8557	24.4031	105.92	63.5003	98.0577	81.36	25.8239	82.9715	31.1238
380	f	15	f_15	74.2082	40.9806	99.332	72.9779	33.7827	59.6277	89.9429	98.983	94.8118	24.5881	94.8646	60.9088	95.196	80.7225	26.2204	84.7962	30.9217
387	f	15	f_15	73.6163	44.5024	99.6355	60.8923	47.7624	57.5695	95.2384	99.9659	90.4938	24.3496	105.243	58.3563	99.5397	82.0104	26.09	82.3896	31.6667
391	f	15	f_15	73.7906	45.3255	99.3936	60.3332	46.9711	60.9136	93.4547	99.9983	93.0183	20.7824	100.469	59.4811	96.2759	81.472	28.003	84.6235	33.0913
393	f	15	f_15	75.3295	40.972	99.3101	73.9649	34.1096	59.0695	92.7852	99.939	93.9027	16.4611	98.81	61.3259	94.3733	75.4171	26.6246	79.9136	33.3167
401	f	15	f_15	76.7936	42.5457	98.9255	70.2058	31.751	60.45	94.2256	99.9877	91.845	21.2643	102.592	58.8671	88.7356	76.1487	28.2247	85.8153	32.8901
402	f	15	f_15	76.288	41.2221	99.1549	69.0742	36.8152	63.493	99.055	99.9953	97.0696	25.9393	102.045	61.5677	91.5507	73.3369	27.7218	80.1052	34.6068
403	f	15	f_15	76.1931	43.354	99.7271	66.5897	35.0279	56.4731	87.9245	99.5164	89.0313	21.577	98.7568	62.2236	111.357	98.17	24.2251	88.1577	27.4793
416	f	15	f_15	75.0294	39.2851	99.3775	80.9265	32.8798	63.8706	96.7542	99.7571	88.4129	24.3707	109.435	63.5351	85.9787	74.2005	29.0303	86.3011	33.6384
418	f	15	f_15	74.8113	43.9719	99.3122	64.9084	34.7472	64.488	93.3386	99.976	90.971	26.2329	102.603	60.2347	109.884	96.3852	24.1039	87.7155	27.4796
425	f	15	f_15	72.7168	44.7453	98.8401	63.4751	34.9125	61.9355	96.3453	99.9068	89.0752	19.7434	108.162	58.645	93.5826	83.3022	28.0403	89.0146	31.5008
426	f	15	f_15	73.9738	42.7761	99.2755	67.984	33.8378	57.6974	97.8211	99.9709	91.1299	18.9329	107.343	59.1637	101.663	78.0444	24.8939	76.7676	32.4276
431	f	15	f_15	73.4918	41.1276	99.4449	72.0241	39.1894	62.9091	92.3873	99.9308	91.5525	21.0267	100.912	58.7739	91.5104	76.7273	26.4148	83.8454	31.5042
453	f	15	f_15	76.7462	40.5882	99.1975	73.5916	41.6268	60.4951	95.0479	99.9011	89.8254	28.3785	105.814	58.7814	89.6287	85.4105	26.619	95.2937	27.9337
454	f	15	f_15	74.1097	41.5255	99.3391	72.0575	30.7713	58.4828	91.8115	99.9634	89.5974	19.9173	102.471	67.919	102.723	81.6032	27.4562	79.4404	34.562
463	f	15	f_15	72.8278	46.5584	99.7713	60.307	29.0123	64.2391	85.507	98.3325	94.6887	20.1411	90.3033	60.4448	113.429	96.3805	24.8103	84.9698	29.199
466	f	15	f_15	72.1053	41.3188	99.712	71.1898	32.9853	66.823	94.6059	99.8327	95.5683	15.7164	98.993	60.2217	92.6416	76.7206	26.8593	82.8144	32.4332
470	f	15	f_15	68.075	36.5381	99.3921	87.5599	35.1262	60.8298	94.6984	99.9987	86.2543	28.8662	109.79	60.8288	88.5186	67.2279	25.1085	75.9478	33.0601
472	f	15	f_15	71.6497	40.9724	99.7722	73.6978	34.6264	59.0464	91.6433	99.2259	96.102	22.5836	95.3604	60.6689	91.0401	76.8149	27.3039	84.3748	32.3602
473	f	15	f_15	72.0914	41.3393	99.6204	71.5061	38.6687	60.5031	95.8528	99.8911	91.2692	20.4879	105.022	62.0396	96.9386	79.4966	26.4567	82.0072	32.2614
486	f	15	f_15	71.8034	40.5293	98.9466	74.5077	39.0529	60.5178	97.3159	99.3461	87.8748	25.8468	110.744	61.5032	98.3896	77.9563	25.3348	79.2323	31.9754
487	f	15	f_15	70.6644	44.6706	99.3766	60.7878	41.7359	57.8659	95.6177	99.9872	90.811	18.6684	105.293	59.4713	98.1689	86.45	27.0618	88.0625	30.7302
490	f	15	f_15	73.7711	42.7131	99.54	68.1601	37.0299	60.1249	99.2648	99.2976	91.6729	23.9831	108.282	63.3138	102.44	85.1051	26.3992	83.0784	31.7763
495	f	15	f_15	75.25	44.8644	99.2845	62.3198	43.4961	58.7756	98.2714	99.914	90.3655	21.5676	108.749	64.0437	96.5534	83.6577	29.7585	86.644	34.3457
498	f	15	f_15	73.4483	44.7306	99.5457	62.7269	33.0881	62.7318	99.1215	99.5099	85.7874	24.6843	115.543	61.2529	100.721	82.0995	27.2027	81.5119	33.3727
499	f	15	f_15	78.3542	41.5556	99.5088	70.457	40.025	64.4987	93.2512	99.9916	95.4494	20.1275	97.697	63.6106	101.127	82.1797	26.1391	81.2636	32.1658
500	f	15	f_15	72.3787	42.5814	99.2187	70.1156	39.3913	68.5523	99.9018	98.0167	84.5436	20.1904	118.166	64.6498	88.8814	77.7409	30.9724	87.4659	35.4109
504	f	15	f_15	77.9445	42.0045	99.518	69.6876	31.8821	68.5219	99.4811	98.9258	89.0341	20.9984	111.734	58.605	95.1131	71.605	25.8816	75.2841	34.3786
514	f	15	f_15	75.4956	39.6791	99.7443	76.6375	32.3118	64.3507	97.4323	99.9951	92.0663	20.944	105.828	63.2851	98.455	73.0813	25.505	74.2281	34.3603
518	f	15	f_15	75.9878	41.1482	99.2301	72.0134	33.5574	61.537	96.8779	99.9982	93.0756	25.1191	104.085	65.145	89.5049	71.4298	29.9492	79.8055	37.5278
519	f	15	f_15	78.1422	39.6834	99.6029	76.5942	36.8749	62.4808	93.9339	99.7625	95.8151	24.7734	98.0366	62.8479	93.6384	73.1139	26.6346	78.0811	34.1114
520	f	15	f_15	70.5347	44.2577	99.3182	64.7142	32.4269	69.6008	93.2082	99.7033	96.1536	26.8308	96.9368	58.3302	88.3733	78.9426	29.212	89.3286	32.7018
521	f	15	f_15	75.3737	46.3399	99.4335	58.6489	38.4576	65.6814	91.4579	99.7006	92.4937	21.9488	98.8802	60.6484	107.685	86.6211	26.0987	80.4393	32.4453
523	f	15	f_15	80.3666	43.2083	99.5779	65.7019	33.0237	61.5314	92.248	99.2834	95.9938	20.0273	96.0979	58.4717	94.7172	83.3501	26.6738	87.9989	30.3115
537	f	15	f_15	73.6783	42.4139	99.4357	70.3719	39.0634	67.1772	95.7063	99.9877	90.0246	26.4051	106.311	61.3462	110.702	86.7472	23.504	78.3611	29.9944
547	f	15	f_15	72.1368	40.6595	99.4216	72.6702	36.8683	58.2426	90.3656	99.6761	97.0693	21.3512	93.0939	64.1773	95.6755	80.4086	27.2736	84.043	32.4519
551	f	15	f_15	74.7338	47.0198	99.1548	57.3587	36.6348	62.9503	97.5358	99.7026	91.9162	14.926	106.114	59.5685	105.239	83.6102	26.6145	79.4476	33.4995
558	f	15	f_15	73.6916	40.5513	99.2821	73.4173	39.3825	62.4073	90.213	99.0444	93.0719	22.3429	96.9282	59.8339	85.8173	82.723	28.2734	96.3943	29.331
578	f	15	f_15	74.3198	37.4049	99.6313	84.5458	37.5639	65.7944	89.3306	99.649	91.5314	21.7345	97.5956	62.9116	88.4287	79.9218	26.6113	90.3799	29.4438
580	f	15	f_15	80.4437	40.8706	99.308	73.7332	30.848	59.239	95.3841	99.9907	92.6892	30.0811	102.907	59.2459	86.2339	79.6129	28.0796	92.322	30.4149
585	f	15	f_15	73.7175	44.3276	99.4231	63.0501	38.9334	60.3085	93.0052	99.9859	88.5936	27.6049	104.98	59.8593	101.475	87.2433	26.1485	85.9753	30.414
589	f	15	f_15	75.7038	47.215	99.614	52.2632	33.6135	64.781	94.4571	99.9834	91.1752	23.3642	103.6	60.0737	98.0353	84.2653	28.9322	85.954	33.6601
590	f	15	f_15	74.062	41.5406	99.5526	71.8966	39.4503	72.7577	89.9419	99.8123	93.6274	26.7761	96.0636	61.8234	97.5086	86.9523	26.338	89.1741	29.5355
591	f	15	f_15	74.2705	40.1499	99.209	73.8203	33.9836	65.6633	95.1748	99.9984	90.0067	21.1433	105.742	61.6207	93.5523	73.9199	26.4458	79.0144	33.4695
593	f	15	f_15	71.2352	42.9891	99.7618	67.1395	40.5514	66.0328	94.5978	99.9909	90.3619	21.3672	104.688	59.081	93.9797	76.4549	27.0254	81.3525	33.2201
595	f	15	f_15	68.5421	44.366	98.8085	64.2796	39.654	60.8025	97.1271	99.4189	85.8155	23.8403	113.181	64.0603	102.095	81.5882	27.8377	79.9138	34.8347
599	f	15	f_15	71.9152	44.3952	99.0636	62.5024	45.9257	54.9434	97.7471	99.9209	90.5701	21.3802	107.924	59.6067	102.469	86.9321	25.825	84.8377	30.4405
601	f	15	f_15	73.2491	41.1176	99.3089	73.5376	32.6794	70.7439	86.4067	99.7819	87.6427	24.8843	98.5897	58.0111	95.6711	80.5985	24.9321	84.2454	29.5946
603	f	15	f_15	70.4879	45.1188	99.6661	60.1594	39.6911	57.2137	88.808	99.9971	85.2951	19.9629	104.119	58.0129	109.392	91.0482	23.9275	83.2313	28.7482
607	f	15	f_15	66.6397	40.1935	99.7671	74.2418	45.6172	62.0192	97.7896	99.7547	89.2438	20.3796	109.576	59.5414	92.1185	72.9375	25.9793	79.1779	32.8114
608	f	15	f_15	76.6675	42.8898	99.4064	67.1591	30.5031	64.8981	97.9272	99.9766	85.5572	25.0865	114.458	59.2741	85.6352	66.4962	29.6871	77.6506	38.2316
610	f	15	f_15	69.4931	43.0739	99.3453	67.826	42.1608	61.1786	97.6015	99.8114	88.9169	20.2375	109.767	63.8838	99.6983	79.0781	27.6005	79.3174	34.7975
623	f	15	f_15	74.8255	41.7242	99.8657	72.8955	28.9102	61.9589	91.7837	99.8515	91.1459	21.5844	100.7	60.5999	94.8999	81.4803	26.6437	85.8593	31.0319
624	f	15	f_15	78.8206	42.4991	99.6981	68.1939	30.4234	61.2371	98.2867	99.0273	88.2893	25.3438	111.323	60.84	101.655	77.2372	25.4354	75.9796	33.4767
630	f	15	f_15	74.7224	41.5903	99.5001	68.8154	36.8349	68.2096	91.462	99.8296	88.7405	19.4219	103.067	61.1984	97.8795	85.8181	26.0041	87.6774	29.6588
633	f	15	f_15	79.353	43.8398	99.2527	62.8473	31.449	56.0065	95.6904	99.8942	89.5002	20.7222	106.916	59.9905	96.0869	69.9381	27.3707	72.7864	37.6042
638	f	15	f_15	71.7161	42.1842	98.6073	71.4302	45.2328	60.9179	95.9361	99.9999	91.5365	24.1572	104.806	59.9645	92.7429	84.3684	27.2749	90.9703	29.9822
645	f	15	f_15	74.7634	43.1521	99.6682	67.8117	35.0493	68.3902	97.8092	99.7846	92.4742	18.9628	105.769	61.4673	103.53	73.8167	25.6202	71.3002	35.9328
652	f	15	f_15	75.6368	41.8293	99.49	68.6202	38.697	57.9044	88.9515	99.6115	91.2931	19.1502	97.4351	56.7259	99.5945	82.417	23.8247	82.7526	28.7903
653	f	15	f_15	71.1923	38.682	99.8754	78.12	37.1579	54.9337	96.7884	99.4305	83.4255	19.3971	116.018	59.7844	89.7009	78.1361	25.781	87.1074	29.5968
656	f	15	f_15	69.9395	38.7286	98.8843	82.4905	42.3105	61.3821	95.019	99.959	93.1105	28.3307	102.05	57.7316	88.1908	73.9097	25.3526	83.8066	30.2513
663	f	15	f_15	73.7078	43.9982	99.4997	66.515	36.8773	60.5695	96.3871	99.9976	93.9945	19.4777	102.545	61.3579	105.74	88.3475	25.5309	83.5516	30.5571
665	f	15	f_15	71.3303	42.4358	99.1367	69.2486	38.3335	60.7466	96.9403	99.8531	91.9291	18.6958	105.451	60.5071	96.4817	82.8313	26.613	85.8518	30.9988
666	f	15	f_15	71.3333	40.0924	99.7096	76.0128	41.6582	61.9791	95.0796	99.9945	90.3376	17.2047	105.249	63.6196	97.7938	81.8182	26.082	83.664	31.1748
012	f	18	f_18	74.5883	44.3174	99.4095	61.6555	35.5966	57.2346	101.148	103.014	90.58	21.1047	111.667	60.5569	97.9711	74.7011	27.393	76.2481	35.9261
019	f	18	f_18	66.0944	40.4848	99.6616	71.4788	42.2626	70.249	92.4708	103.733	92.8582	22.8641	99.5828	64.2673	100.237	78.1579	25.957	77.9732	33.2896
021	f	18	f_18	68.3244	44.9532	98.7493	62.0051	38.3404	58.4908	97.9145	103.415	89.4779	21.2888	109.429	57.9739	110.914	83.3208	23.4967	75.1221	31.278
022	f	18	f_18	75.9694	42.3226	99.6262	69.2364	32.4391	62.3673	81.5874	101.081	97.4574	23.2427	83.716	59.7544	89.5197	76.3228	28.2503	85.2581	33.1351
031	f	18	f_18	70.0025	41.5953	99.402	69.7051	40.7699	53.7981	96.3529	103.703	97.0371	24.9338	99.2948	62.2616	94.9952	78.3086	27.2623	82.4342	33.0716
032	f	18	f_18	74.2252	41.3928	99.6973	72.4955	36.1029	61.2769	94.3626	103.531	95.548	22.7453	98.7594	62.9816	85.4683	84.1212	30.5023	98.4238	30.9908
033	f	18	f_18	70.4011	41.6908	99.6247	68.348	40.8999	65.633	92.3114	103.529	94.6216	24.8392	97.5585	62.8866	105.93	82.1177	24.7502	77.5204	31.9273
041	f	18	f_18	71.1611	40.8113	99.6911	72.9691	38.547	66.3359	101.165	103.46	95.5631	25.8555	105.862	60.0193	88.9948	74.556	27.5237	83.7757	32.854
048	f	18	f_18	70.3007	39.8397	99.6197	77.8578	41.6929	63.5288	100.861	103.682	93.9721	23.5679	107.331	64.3286	97.4976	76.0899	26.2862	78.0429	33.6817
056	f	18	f_18	75.553	44.8167	99.6442	61.4237	47.3205	70.5944	85.2183	101.926	101.543	22.7458	83.9234	60.3524	97.9377	88.2471	27.6175	90.1054	30.6503
060	f	18	f_18	73.3583	40.4536	99.7544	75.9001	35.5316	54.969	98.6491	103.62	92.6384	24.2729	106.488	63.5397	96.3314	82.9809	26.683	86.1411	30.9759
064	f	18	f_18	79.3491	37.7943	99.5149	82.3277	40.579	53.2137	101.91	103.059	95.2694	22.2411	106.97	66.2581	87.1922	69.7942	28.7202	80.0464	35.8795
066	f	18	f_18	74.6385	40.4519	99.5179	75.0584	37.7771	60.9163	96.7063	103.572	97.6098	18.9146	99.0743	60.0312	93.7684	77.284	25.8976	82.4201	31.4215
068	f	18	f_18	78.1799	41.6313	99.5118	68.6435	37.8893	55.5928	96.2847	103.055	98.2479	29.3823	98.0017	57.7811	89.048	76.4209	27.0135	85.8199	31.477
077	f	18	f_18	77.92	42.628	99.7461	67.3887	33.2432	65.0424	93.825	103.25	99.0614	25.3126	94.714	57.2686	88.072	69.8793	27.7188	79.3434	34.9352
079	f	18	f_18	66.0921	41.8641	99.3798	70.5981	41.3632	60.7897	96.6514	104.11	90.9048	28.1647	106.322	64.0523	98.8964	91.7194	27.1141	92.743	29.2358
081	f	18	f_18	71.9109	41.1711	99.6629	73.9861	33.5009	59.9126	100.556	103.133	96.0044	18.6141	104.741	61.9815	103.262	71.2561	24.7123	69.0052	35.8123
082	f	18	f_18	70.8583	39.9139	99.4571	76.0863	33.3713	63.2197	97.5178	103.679	93.9054	22.9771	103.847	60.9615	91.5972	76.3029	26.5643	83.3026	31.8889
083	f	18	f_18	73.8854	39.4564	99.5046	76.2153	38.741	62.6103	97.9888	103.281	97.8257	27.6539	100.167	61.645	86.9897	67.1802	27.9607	77.2278	36.2055
088	f	18	f_18	65.9491	42.1667	98.4762	71.1628	40.3144	65.9592	96.5898	103.938	92.9714	24.1935	103.892	62.6746	96.9493	82.4362	27.2594	85.0302	32.0585
090	f	18	f_18	70.2381	39.7615	99.573	73.1916	37.4316	67.4399	100.01	103.586	91.7764	26.4171	108.971	63.3234	89.3466	78.1564	28.1805	87.4756	32.2153
092	f	18	f_18	77.3113	43.4436	99.8686	65.7644	30.7568	57.6503	92.6515	103.502	98.3457	19.2001	94.21	64.8739	112.084	93.0246	25.1451	82.9957	30.2969
093	f	18	f_18	68.5024	39.4721	99.1605	75.9249	35.213	53.719	100.423	103.891	92.4611	22.8146	108.611	65.1361	91.2004	81.708	28.1913	89.5917	31.4664
095	f	18	f_18	73.4542	39.2575	99.5184	78.3526	38.6378	60.4434	96.5551	104.016	97.1775	18.191	99.3596	61.8546	95.1886	83.0193	25.5099	87.2156	29.2492
097	f	18	f_18	76.1036	40.276	99.338	73.8188	36.343	68.1192	100.02	103.944	98.8124	21.1321	101.222	60.9942	85.9258	78.0308	28.5898	90.8119	31.4825
100	f	18	f_18	66.5929	39.7021	99.4094	75.3431	38.6158	64.9001	95.6211	103.224	93.2119	22.8537	102.585	59.6798	97.2715	76.6107	24.3588	78.7597	30.928
107	f	18	f_18	70.643	43.4313	99.6694	65.219	45.7512	61.7443	98.0904	103.658	93.2385	21.912	105.204	63.3755	90.1022	86.1246	30.5484	95.5855	31.9592
108	f	18	f_18	76.7364	43.3439	99.1532	66.7795	41.9171	61.3812	100.397	104.221	90.8239	19.5341	110.541	57.7706	90.4563	83.1432	27.682	91.9153	30.1168
118	f	18	f_18	78.9387	39.0901	99.7228	75.8914	41.1945	66.0268	100.162	103.572	98.7058	26.0894	101.476	58.6792	86.9513	66.5163	26.38	76.4984	34.4844
120	f	18	f_18	76.1253	41.9308	99.7129	70.9274	35.7287	56.4547	91.3233	104.015	92.1735	23.0662	99.0776	57.9253	93.3435	88.852	26.0206	95.1882	27.3359
123	f	18	f_18	71.7141	45.7164	99.4995	57.4334	46.5076	57.9553	93.9422	104.053	88.968	21.3771	105.591	61.262	106.867	90.6513	26.2071	84.826	30.8951
124	f	18	f_18	75.8361	41.4365	99.4177	71.2667	38.781	61.7096	99.136	103.307	101.549	23.7308	97.6237	59.0097	84.7877	71.8296	28.8386	84.717	34.0411
125	f	18	f_18	72.364	39.8504	99.3009	76.464	35.4129	66.6382	99.0424	103.943	96.8956	23.9253	102.216	61.7127	89.9644	81.5503	27.3361	90.6473	30.1566
128	f	18	f_18	73.2099	43.0271	99.9575	66.7843	32.6747	60.581	91.2311	103.356	93.2077	23.6494	97.8793	63.8907	100.959	80.8703	27.2293	80.1022	33.9931
130	f	18	f_18	72.3759	41.7032	98.8199	72.1178	33.4803	62.3894	101.998	103.483	96.8329	25.209	105.335	63.1089	94.7735	75.6023	27.7698	79.7716	34.8117
131	f	18	f_18	72.4859	41.1351	99.3458	73.2808	37.0566	59.0895	101.569	103.061	94.1156	23.6335	107.919	62.2898	91.2691	70.1802	28.0741	76.8937	36.5102
132	f	18	f_18	73.1723	42.5279	99.672	66.2775	32.6122	59.4011	94.8396	103.326	99.1584	26.4561	95.6445	62.8609	91.9133	80.4971	29.0855	87.5794	33.2104
133	f	18	f_18	74.2726	37.972	99.0213	80.9239	40.4148	62.01	98.6078	103.89	91.0288	29.4075	108.326	60.0601	82.2573	72.1765	27.7253	87.7448	31.5976
134	f	18	f_18	72.0099	40.3347	98.5084	75.6196	47.125	56.6519	98.5075	103.666	96.9482	19.0988	101.608	56.2419	87.5069	73.912	25.9236	84.4642	30.6919
137	f	18	f_18	71.0867	41.6241	99.5218	71.2643	38.6731	57.0581	96.9817	103.723	95.2252	23.3261	101.845	62.9913	97.7923	79.1153	26.8114	80.9013	33.1409
138	f	18	f_18	71.4437	43.6197	99.0238	65.3392	45.1365	56.6964	102.119	102.626	93.8327	21.1274	108.831	60.1907	103.344	73.9393	25.4054	71.5466	35.5089
141	f	18	f_18	71.4189	41.6469	99.5675	69.4928	38.4133	60.7902	94.0284	103.971	93.7264	23.1686	100.322	58.9116	88.7203	77.507	27.6542	87.3611	31.655
142	f	18	f_18	75.0382	42.926	99.3355	68.7651	32.5798	56.9608	94.822	103.826	94.9923	26.513	99.8206	57.3256	97.9002	88.143	25.1354	90.0335	27.9178
143	f	18	f_18	78.7815	40.8849	99.3054	73.5278	43.8328	61.6437	84.6736	102.381	98.7455	26.6673	85.7494	61.3851	91.0115	78.4426	27.5759	86.1898	31.9943
146	f	18	f_18	75.6742	41.772	99.6431	70.3917	34.7541	59.7169	94.4425	104.105	89.2668	22.7255	105.798	60.1301	103.976	86.5439	24.1569	83.2342	29.0229
148	f	18	f_18	67.1956	37.678	99.2974	83.8121	42.0209	58.8543	89.6597	104.184	90.1721	23.1857	99.4318	61.6736	92.2029	87.4888	25.2024	94.8873	26.5603
151	f	18	f_18	73.2718	42.0782	99.223	69.3649	40.2053	58.0189	97.731	103.816	91.7994	22.5665	106.461	65.4786	99.8946	87.7513	27.5812	87.8438	31.398
152	f	18	f_18	72.7434	39.7306	99.1612	76.8539	34.933	64.5142	94.5201	104.09	90.2657	25.7201	104.713	62.3517	88.1142	81.2765	28.1143	92.24	30.4795
153	f	18	f_18	77.9182	41.9097	98.9108	68.493	44.0551	54.168	102.732	103.262	94.1311	27.0121	109.137	56.6731	91.1355	70.6332	26.0617	77.5035	33.6265
155	f	18	f_18	82.0509	42.0333	99.2537	70.7166	36.6115	63.5909	96.0122	103.541	94.7861	22.4942	101.294	62.7452	98.9776	83.9792	26.6463	84.8467	31.4053
156	f	18	f_18	74.2211	36.5655	99.1272	88.8626	34.092	67.2271	95.877	103.152	98.7891	23.583	97.0522	58.3011	78.0512	65.2079	27.313	83.5451	32.6925
158	f	18	f_18	76.9187	46.0127	98.6796	59.9888	48.0674	54.5858	98.0539	103.777	93.8311	24.4328	104.5	58.2762	101.709	85.9975	26.3639	84.5526	31.1805
160	f	18	f_18	67.9037	41.3478	99.2068	70.6453	47.8667	60.5446	97.0275	103.639	93.6949	22.3833	103.557	61.9225	88.8728	75.1401	28.8093	84.5479	34.0745
164	f	18	f_18	70.9492	43.6324	99.1551	65.7265	34.5973	59.575	95.0082	103.293	96.0138	22.1602	98.9526	59.5374	109.494	73.089	23.725	66.7514	35.5424
165	f	18	f_18	72.4907	40.572	99.3795	74.3417	41.6141	56.2405	99.1881	103.582	93.972	26.6526	105.551	57.4561	88.5429	70.5969	26.3274	79.7319	33.02
167	f	18	f_18	73.985	43.4148	99.6075	65.9239	34.2867	65.7397	94.8676	103.803	90.6968	20.4211	104.599	62.9245	106.853	87.1344	25.5664	81.5458	31.3522
201	f	18	f_18	75.9777	41.6938	99.3398	68.2476	34.8118	64.0448	91.221	103.801	91.9101	21.1196	99.2502	59.2816	94.7903	81.2036	26.0751	85.6665	30.438
208	f	18	f_18	73.2456	45.3768	99.939	59.9951	41.356	57.2778	87.7926	102.993	95.0155	19.6713	92.3982	61.2225	104.038	87.7258	26.7025	84.3206	31.6678
245	f	18	f_18	72.0478	42.1311	99.4911	70.6151	38.8554	64.2907	95.8681	103.618	95.7388	28.5961	100.135	65.0225	97.3357	83.3495	28.1445	85.631	32.8672
250	f	18	f_18	72.7116	38.3657	99.5921	79.9906	40.9291	60.2666	95.6939	104.475	90.1852	24.9681	106.108	59.3605	88.8244	78.7034	25.6394	88.6056	28.9366
255	f	18	f_18	72.0072	41.2258	98.9841	71.6124	38.2999	58.7319	94.1962	103.846	95.704	27.4931	98.4245	59.7743	92.4096	79.0158	26.6665	85.5061	31.1867
264	f	18	f_18	73.2579	44.6744	99.5672	62.9644	39.2089	65.651	88.5254	100.849	101.317	22.4589	87.3746	60.6118	95.7924	80.3391	28.2673	83.8679	33.7046
269	f	18	f_18	71.7787	40.6456	99.5227	72.0014	39.0515	65.309	98.1988	103.596	91.204	24.7943	107.669	63.2648	90.8675	74.1372	28.2987	81.5882	34.6848
275	f	18	f_18	80.1996	45.9511	99.7874	58.5216	36.9083	64.5535	96.5426	103.796	98.9901	25.7366	97.5275	60.352	98.102	86.3594	28.269	88.0302	32.1128
277	f	18	f_18	73.2573	40.9392	99.8543	74.8143	42.9179	64.2836	96.0872	103.432	94.9144	20.9426	101.236	62.3176	82.4954	68.1444	30.9258	82.6038	37.4386
283	f	18	f_18	71.7547	45.0579	99.093	61.4777	45.8657	70.3236	100.054	104.067	94.6266	25.4512	105.735	60.3246	100.416	93.869	27.0684	93.4803	28.9563
294	f	18	f_18	71.655	45.327	98.6259	62.4268	38.1234	69.3031	97.7758	103.762	96.8473	20.5926	100.959	63.0334	97.9644	87.2594	29.1648	89.0726	32.7428
299	f	18	f_18	81.4985	42.0154	99.7351	69.9295	37.3508	63.656	95.955	103.527	96.9017	20.2761	99.023	61.3602	100.337	79.4966	25.6941	79.2295	32.43
301	f	18	f_18	71.7067	37.4412	99.8442	82.9179	36.7708	67.2684	90.7494	102.74	98.3683	22.7133	92.2547	61.5147	81.446	70.1452	28.2786	86.1249	32.8344
304	f	18	f_18	80.0563	42.8343	99.8929	66.8276	35.8856	61.0117	92.241	102.799	97.3222	23.3943	94.779	60.7361	103.294	79.7161	25.1863	77.1741	32.6357
306	f	18	f_18	71.0834	44.5996	98.7675	62.9753	40.7754	64.0026	99.7146	103.679	94.5635	21.3624	105.447	61.1238	110.462	82.3047	24.6791	74.5094	33.1221
322	f	18	f_18	71.2162	40.933	98.6553	73.7276	36.3107	64.5118	92.0803	103.371	96.3008	17.1119	95.6174	59.4398	85.301	71.3953	28.5231	83.698	34.0786
325	f	18	f_18	73.0196	41.3624	99.3187	71.0684	44.0812	64.3707	98.2969	104.155	93.0681	27.8021	105.618	62.3759	97.7006	88.7436	26.4074	90.8322	29.0727
326	f	18	f_18	73.2799	46.0166	99.5933	59.7438	43.2941	60.9812	91.4831	103.614	92.4839	30.8269	98.9178	61.7124	99.5489	91.7066	28.5267	92.1222	30.9661
329	f	18	f_18	76.9443	45.1117	99.6609	61.4109	32.6199	62.4105	101.017	103.397	92.4175	19.5624	109.305	57.5709	95.1303	78.6178	27.3006	82.6422	33.0348
330	f	18	f_18	77.0672	41.2603	99.3755	69.8908	38.9884	64.3005	94.672	103.591	96.0861	18.798	98.5284	57.2491	87.9449	68.9743	26.859	78.429	34.2463
339	f	18	f_18	73.9321	42.2353	98.9156	69.628	38.7005	58.9278	101.293	103.632	95.6329	14.606	105.918	60.9756	94.7486	80.8475	27.1806	85.3284	31.8541
344	f	18	f_18	74.9833	40.7501	99.6455	72.9982	37.4179	60.8651	95.1164	103.421	94.3368	17.2441	100.826	60.0585	94.7472	78.0847	25.8308	82.4137	31.3428
348	f	18	f_18	74.727	45.1755	99.7413	60.6535	33.8681	62.7119	92.9774	103.506	101.868	22.6566	91.2725	59.9642	102.709	103.911	26.3746	101.17	26.0696
349	f	18	f_18	76.2651	42.9781	99.804	66.3717	37.3476	58.6803	93.772	103.267	96.1523	25.1629	97.5244	64.0484	98.3091	83.112	28.0002	84.5415	33.1201
350	f	18	f_18	78.4178	46.1307	99.9012	58.9393	43.3478	72.184	93.4269	103.556	96.3389	18.9897	96.9774	61.0324	97.9192	83.298	28.753	85.0681	33.8
352	f	18	f_18	78.1076	39.2274	99.8434	76.3085	41.1108	64.6335	98.1804	103.916	94.5055	24.102	103.889	58.238	93.7845	77.4339	24.3593	82.5657	29.5029
363	f	18	f_18	70.7118	43.9805	98.8799	64.7802	36.4712	65.0191	99.7509	103.843	94.9355	20.9646	105.072	65.0525	103.194	86.2284	27.7248	83.5594	33.1798
365	f	18	f_18	78.5375	42.6383	99.8535	66.5028	36.7487	70.0615	93.3792	103.541	97.7147	28.4109	95.5631	60.6692	96.562	85.0266	26.7894	88.0539	30.4238
370	f	18	f_18	74.9862	38.2287	99.7079	79.4108	34.116	67.5724	90.7523	101.11	100.256	25.2434	90.5209	61.4198	86.5572	69.9617	27.1266	80.8271	33.5612
377	f	18	f_18	72.9582	39.4933	99.7189	77.2015	41.7791	61.3738	98.3224	103.801	91.4097	23.1257	107.562	62.9439	94.0603	77.2195	26.4284	82.0957	32.1921
380	f	18	f_18	78.4979	41.3193	99.599	72.5349	35.6088	69.0733	88.4819	101.831	98.4808	26.6886	89.8468	59.6029	91.9122	76.9636	26.7946	83.736	31.9988
387	f	18	f_18	74.4774	43.9844	99.615	63.8455	44.3124	60.7985	96.4766	104.141	89.813	25.6399	107.419	59.7507	99.9768	88.496	26.2871	88.5166	29.6974
391	f	18	f_18	78.942	45.436	99.4748	59.8264	39.3378	70.4513	95.4688	103.876	96.8766	21.07	98.5468	58.8771	94.6129	88.7665	28.2746	93.8207	30.1368
393	f	18	f_18	73.2883	41.534	98.9398	73.0047	38.1032	65.3904	90.5343	103.702	96.9353	21.7604	93.3966	62.2208	93.9917	80.2552	27.4947	85.3854	32.2007
401	f	18	f_18	80.6534	42.3693	98.9543	70.2533	37.0088	66.7799	93.4624	103.152	97.9679	24.5221	95.401	58.3887	89.1882	75.0661	27.7378	84.166	32.9561
402	f	18	f_18	80.5574	41.9471	99.6736	70.4447	34.989	67.7085	97.5161	102.601	103.302	25.0279	94.399	60.0218	88.7691	72.724	28.3628	81.925	34.6205
403	f	18	f_18	71.7729	43.5531	99.8025	66.4843	37.9805	60.5354	97.8607	104.297	91.3998	21.3645	107.069	61.6134	112.441	97.9073	23.8654	87.0741	27.4081
416	f	18	f_18	76.5106	39.0659	99.3809	80.2226	37.1419	68.1744	94.7578	103.655	94.1931	26.0444	100.599	64.03	86.7402	76.9178	28.8377	88.6761	32.5203
418	f	18	f_18	74.503	45.0321	99.2574	61.9997	37.5978	69.3732	97.2565	104.216	94.5364	27.3361	102.877	59.6685	105.992	94.7756	25.3509	89.4175	28.3511
425	f	18	f_18	73.8837	44.0371	99.5427	63.7414	35.4428	68.2191	90.3445	103.168	97.0506	21.5316	93.0901	58.2562	91.7618	82.526	27.9576	89.9351	31.0864
426	f	18	f_18	77.4838	43.0339	99.327	68.0629	28.7015	62.2047	96.3132	103.38	97.9435	19.9447	98.3355	59.4407	102.299	81.0908	25.0049	79.2687	31.5445
431	f	18	f_18	78.4698	40.2135	99.3538	76.6489	37.2293	66.6496	95.1713	103.768	96.0918	23.3904	99.0421	58.7529	89.6261	75.6052	26.3613	84.3562	31.25
453	f	18	f_18	78.2823	39.8571	99.2258	76.6274	42.9568	67.0708	95.678	104.108	97.5883	28.8021	98.0425	57.9545	87.0158	78.6108	26.5457	90.3408	29.384
454	f	18	f_18	76.3785	41.7452	99.2416	71.9707	34.2208	61.4835	88.8252	102.843	94.9785	21.425	93.5213	68.4139	103.533	86.2722	27.5851	83.3286	33.104
463	f	18	f_18	72.9512	45.6195	99.7672	61.8923	33.2687	65.1959	85.2416	100.768	98.8566	28.6299	86.2275	60.907	109.553	93.5031	25.3626	85.3495	29.7161
466	f	18	f_18	74.3978	41.5574	99.7015	70.6744	32.3749	65.7921	94.5477	102.887	99.5655	20.3347	94.9604	61.0523	92.2193	75.6491	27.5124	82.0317	33.5388
470	f	18	f_18	73.062	36.65	99.4654	87.9264	37.3942	62.3348	99.7025	103.778	92.0417	31.6686	108.323	61.1871	81.1539	65.4371	27.6327	80.6333	34.2696
472	f	18	f_18	69.0458	40.5089	99.4853	73.4661	45.2332	52.8741	100.529	103.547	94.9042	25.3895	105.927	63.1737	92.2822	76.3722	27.7312	82.7595	33.5082
473	f	18	f_18	72.0636	41.2774	99.5875	72.6112	42.7348	69.0597	100.857	103.422	91.0619	25.6101	110.756	60.9679	94.3963	82.4416	26.6599	87.3357	30.5258
486	f	18	f_18	73.605	40.2619	99.352	73.9126	43.2611	59.815	96.2294	103.928	95.5341	22.8654	100.728	61.0399	98.546	81.7939	24.9384	83.0008	30.046
487	f	18	f_18	75.1358	43.0527	99.3924	65.428	40.9325	57.4324	102.056	103.49	94.1153	18.3987	108.437	61.0179	95.7259	76.9204	27.4428	80.3549	34.152
490	f	18	f_18	73.0854	42.4513	99.5822	68.6666	43.8717	60.638	93.5482	103.391	99.2784	26.3419	94.2281	64.3771	107.167	86.8034	25.5012	80.9981	31.4837
495	f	18	f_18	70.6475	44.5892	99.4098	62.072	49.7015	57.6748	100.404	103.7	92.8258	22.6763	108.164	64.7505	96.4656	86.3393	29.9296	89.5027	33.4398
498	f	18	f_18	76.0313	43.2845	99.5316	66.0014	39.9549	63.9507	97.0955	103.973	90.332	29.2089	107.487	62.6844	102.971	88.6864	26.3499	86.1279	30.5939
499	f	18	f_18	78.8086	41.6186	99.5609	70.0777	41.5041	62.2451	93.1627	103.277	102.586	25.1292	90.8146	64.5739	99.6999	84.4651	26.9557	84.7194	31.8176
500	f	18	f_18	70.3073	43.329	99.5311	67.3992	39.6755	65.3252	102.734	103.659	93.3738	24.4187	110.025	63.5068	92.4233	84.2343	29.7727	91.1396	32.6671
504	f	18	f_18	76.7669	42.7191	99.5408	69.4015	37.0039	64.797	97.3177	103.658	96.703	24.6741	100.636	57.9887	97.0578	76.4094	25.5232	78.7257	32.4204
514	f	18	f_18	72.3134	40.0307	99.6214	75.8749	38.4707	66.8391	97.788	103.535	96.9298	25.1612	100.885	64.918	102.596	80.3333	25.3295	78.3005	32.3491
518	f	18	f_18	74.8638	40.8873	99.2609	76.3684	38.9337	64.2165	96.2046	103.573	95.3625	25.8	100.883	64.9266	86.3532	73.1938	30.742	84.761	36.269
519	f	18	f_18	78.2613	39.2956	99.7798	78.1939	35.6301	67.8692	95.2265	103.484	99.2897	23.1043	95.9077	62.6465	92.5831	69.7377	26.5895	75.3245	35.2999
520	f	18	f_18	75.7836	43.6252	99.3096	64.9254	35.3364	70.1763	92.9253	103.13	99.4954	36.2019	93.3966	58.6626	90.6401	85.1647	28.2344	93.9591	30.0496
521	f	18	f_18	77.6516	46.2078	99.5169	59.4167	38.9232	72.002	94.4145	103.779	96.6807	18.9808	97.656	61.0395	111.654	91.6344	25.2611	82.0702	30.7799
523	f	18	f_18	74.436	41.6044	99.4326	70.9146	34.4046	55.953	98.456	104.09	98.4783	19.3184	99.9773	60.4355	90.7806	84.316	27.6973	92.8789	29.8209
537	f	18	f_18	72.7046	42.2151	99.4757	72.3239	38.7621	63.3742	100.323	103.969	90.74	22.6678	110.561	61.9046	107.274	82.9725	24.3611	77.3464	31.4961
547	f	18	f_18	79.9286	40.5489	99.4877	73.2469	37.0358	62.1629	92.0536	103.227	102.082	23.8158	90.1764	64.9344	95.4624	80.4736	27.5817	84.2987	32.719
551	f	18	f_18	76.5911	47.7569	99.2368	56.305	37.7663	68.5766	99.5597	103.989	94.8638	21.6736	104.95	59.7809	106.133	89.819	26.8998	84.629	31.7856
558	f	18	f_18	72.0478	40.4026	98.7736	73.3747	44.8806	60.765	102.093	103.115	89.631	24.0608	113.904	60.3676	84.5627	76.1426	28.8426	90.0428	32.0321
578	f	18	f_18	71.9701	37.1108	99.4357	85.288	44.491	57.7233	95.9197	104.13	92.12	29.4106	104.125	63.9862	87.9813	78.5271	26.9896	89.2543	30.239
580	f	18	f_18	78.5828	40.9699	99.2184	75.3708	33.3044	62.4512	99.9443	103.703	96.6546	27.6427	103.404	58.3808	86.9439	74.1076	27.5103	85.2361	32.2754
585	f	18	f_18	77.1412	43.4857	99.4473	65.7326	34.1134	55.3152	98.5855	103.612	88.6058	24.8954	111.263	60.4605	99.0419	82.7759	26.546	83.5767	31.7624
589	f	18	f_18	70.5944	45.6781	99.6739	59.5673	32.7399	68.4075	91.6366	103.518	90.9293	23.7591	100.778	61.0965	99.1231	93.4314	28.1546	94.2579	29.8698
590	f	18	f_18	75.1761	41.9024	99.5372	69.386	40.5015	74.3647	96.9916	104.066	98.0817	28.1719	98.8886	61.3353	95.527	87.6937	26.9044	91.7999	29.3077
591	f	18	f_18	73.1331	40.4763	98.9792	73.9454	38.2908	64.5071	101.258	103.158	90.6842	22.0055	111.66	61.6774	92.4461	70.6516	27.0047	76.4247	35.335
593	f	18	f_18	74.3174	43.1135	99.8228	68.3391	35.1637	62.6527	100.505	103.06	89.8146	21.6237	111.903	59.6105	90.9102	76.0734	28.2698	83.6797	33.7834
595	f	18	f_18	72.7104	44.7409	99.0293	63.2526	38.1829	61.4881	94.5674	104.146	88.3669	26.596	107.017	64.5153	106.459	90.2563	27.1135	84.7805	31.9808
599	f	18	f_18	76.704	42.6063	99.1763	69.4742	43.6665	55.4393	95.909	103.604	93.7352	25.3591	102.319	59.4612	97.2584	87.6747	26.0484	90.1462	28.8957
601	f	18	f_18	72.6779	40.5905	99.1831	73.9732	36.2689	73.7911	95.1267	103.811	93.6409	21.1915	101.587	58.7677	93.3718	77.6703	25.5475	83.1838	30.7121
603	f	18	f_18	72.7104	42.8454	99.7535	65.2189	42.1964	56.4602	92.5201	103.845	93.0565	24.0371	99.4236	60.7376	102.024	82.2831	25.507	80.6506	31.6265
607	f	18	f_18	71.8221	40.2056	99.8592	74.3639	41.7833	64.0002	100.339	103.903	95.8286	22.0974	104.707	59.2609	89.7297	75.5733	26.5533	84.2232	31.5273
608	f	18	f_18	75.9406	42.5276	99.3961	68.6955	34.0898	64.3803	102.995	103.422	94.1478	24.3962	109.397	61.4754	89.6772	77.7435	29.1534	86.6926	33.6286
610	f	18	f_18	69.9176	42.884	99.3965	66.2916	44.6839	64.9584	100.181	103.497	94.2235	20.9814	106.322	64.2137	98.3261	78.1459	28.0062	79.4763	35.2385
623	f	18	f_18	82.661	40.7101	99.9335	72.9498	28.7043	60.8964	91.0297	103.285	97.4761	22.2233	93.3867	61.9923	90.1479	78.7101	27.9952	87.3122	32.0634
624	f	18	f_18	74.9119	41.5638	99.5744	70.8802	30.2405	60.2579	96.7225	104.364	92.81	27.4286	104.216	62.0357	102.565	86.5113	25.1395	84.3474	29.8047
630	f	18	f_18	77.0998	41.3853	99.6127	70.5419	36.6793	73.7573	95.5698	103.541	94.5656	21.1721	101.062	61.9384	96.3174	79.0787	26.6134	82.1022	32.415
633	f	18	f_18	80.9961	43.7006	99.4755	64.7894	39.6254	58.5583	91.4653	102.756	97.0416	21.7088	94.2537	61.2375	94.694	78.6667	28.2606	83.0746	34.0184
638	f	18	f_18	77.2192	41.5684	98.7882	73.1548	39.0557	59.6192	100.971	103.749	95.1148	24.6121	106.157	61.5655	93.8777	78.0845	27.2608	83.1769	32.7745
645	f	18	f_18	78.788	42.8128	99.8055	67.0043	36.4303	63.6724	97.852	103.572	95.6585	20.6366	102.293	61.391	102.017	78.3506	25.7636	76.8017	33.5456
652	f	18	f_18	76.2445	41.3944	99.3253	72.0057	39.2543	55.811	95.7947	103.844	97.1707	24.4887	98.5839	58.9605	99.6535	78.474	24.4912	78.7468	31.1012
653	f	18	f_18	74.0139	38.629	99.9677	79.2212	38.8486	62.1262	92.4619	104.331	88.2425	27.0252	104.782	60.2792	86.0991	81.7766	27.0447	94.9796	28.4742
656	f	18	f_18	72.2674	39.0381	98.9371	79.4542	43.8005	63.8715	91.9991	102.484	101.375	31.6392	90.7516	58.2833	91.2903	74.1501	24.9235	81.2245	30.6847
663	f	18	f_18	74.8973	44.2392	99.349	63.9363	39.7697	60.1006	97.4783	103.972	97.8631	23.0409	99.6068	62.403	107.639	95.4084	25.6473	88.6372	28.9351
665	f	18	f_18	76.4922	42.1051	99.2493	71.0779	38.9396	67.0916	99.4046	103.806	95.2997	20.3592	104.307	62.0423	92.4237	80.7162	28.2643	87.3328	32.3639
666	f	18	f_18	73.0399	39.8981	99.8086	77.5019	39.3171	64.2748	94.738	104.496	94.2632	23.6546	100.504	63.6165	100.474	93.4175	25.2621	92.9772	27.1703
002	m	12	m_12	74.6887	41.0257	100.456	71.1629	32.9697	65.3516	86.2847	98.2891	91.8357	25.5475	93.9555	60.4753	102.434	88.4609	24.2208	86.3588	28.0468
005	m	12	m_12	74.9155	38.2722	99.9077	78.3936	35.8388	66.7562	92.0551	99.3133	83.2474	29.0052	110.58	61.6033	80.1081	76.6476	29.4314	95.6802	30.7602
006	m	12	m_12	72.1529	40.3283	100.395	71.9235	29.923	63.9678	88.6164	97.6962	96.5085	21.4977	91.8224	58.9602	94.3814	76.6683	25.1931	81.2324	31.0136
010	m	12	m_12	74.9382	41.0176	99.8031	70.4619	33.7911	63.0313	88.0984	98.9933	92.3635	24.8988	95.3823	59.9438	94.4736	73.3882	26.0258	77.6812	33.5033
011	m	12	m_12	80.5072	37.9999	100.118	78.4345	38.8773	64.4332	92.5114	99.2728	86.4757	27.3864	106.98	61.5389	78.3081	73.645	29.8624	94.0452	31.7533
015	m	12	m_12	74.8191	36.8846	100.349	82.7957	30.9925	67.5461	94.2348	99.1616	89.7118	28.9436	105.042	59.6372	94.9476	71.373	23.1675	75.171	30.8197
016	m	12	m_12	74.5334	41.1185	100.366	69.215	27.933	64.8083	89.5691	98.8592	88.0985	24.8708	101.669	64.1493	96.4679	89.8295	27.343	93.1185	29.3637
023	m	12	m_12	80.6905	40.8032	100.079	70.6735	33.0877	63.1848	89.9686	98.3375	94.0016	21.6334	95.7097	57.9915	88.2057	76.6838	26.8263	86.9375	30.857
034	m	12	m_12	80.9426	42.2783	100.532	68.5306	21.7995	70.2658	83.2036	99.0578	87.4558	19.4131	95.1379	57.6547	83.1246	82.1545	29.324	98.8329	29.6702
045	m	12	m_12	70.3091	41.1243	100.458	71.4676	33.4873	60.2391	93.8407	99.257	82.6021	29.7684	113.606	63.1557	85.7468	81.2852	30.2896	94.7968	31.9521
054	m	12	m_12	77.626	39.08	99.5046	79.0457	37.4995	58.9166	99.2349	98.0334	87.4134	24.2492	113.524	70.708	85.1754	72.926	32.4421	85.6187	37.8914
059	m	12	m_12	73.9874	41.6306	100.221	72.5193	34.7214	66.7459	92.6708	99.0428	91.6766	27.4564	101.084	62.4501	102.471	85.966	25.3713	83.8927	30.2426
071	m	12	m_12	72.723	47.66	100.225	53.4783	41.9234	65.6243	87.9957	99.1341	88.5952	25.7981	99.3233	56.9897	100.936	99.6821	26.9094	98.7577	27.2479
072	m	12	m_12	76.4082	40.736	99.7209	71.2663	39.116	64.794	93.5656	98.9701	93.5655	24.8701	100	62.1456	91.695	86.0909	27.6085	93.8883	29.4057
076	m	12	m_12	77.2524	44.682	99.5553	59.7161	31.1448	67.7976	88.7718	99.0817	90.7649	34.6902	97.8041	61.0885	94.1663	85.8363	28.9865	91.1539	31.7996
084	m	12	m_12	74.1465	40.6887	100.242	73.5888	31.7352	68.4086	86.9149	97.848	95.2736	25.2555	91.2267	60.8631	85.5557	78.977	28.9453	92.3106	31.3564
085	m	12	m_12	83.5522	44.067	100.478	66.3931	32.723	67.8241	91.6455	97.9651	99.1794	23.3833	92.4037	55.1491	97.5299	75.4995	24.918	77.4116	32.189
086	m	12	m_12	73.6329	38.5771	99.9297	78.8797	24.8914	71.6336	96.8385	99.1641	86.1573	16.9257	112.397	54.8231	76.048	57.3957	27.8103	75.473	36.848
098	m	12	m_12	77.2096	45.0762	99.6427	61.9681	34.1781	62.4637	90.0802	99.2561	88.7089	20.0054	101.546	60.1969	100.794	85.7996	26.9207	85.1236	31.6254
105	m	12	m_12	77.8072	42.8961	100.436	65.8319	31.4854	66.8114	85.1428	98.6251	87.5084	24.2641	97.2968	58.1069	100.221	86.389	24.8707	86.1987	28.8527
110	m	12	m_12	74.9971	40.8108	100.329	69.1672	28.8784	65.319	86.7123	97.5416	96.4868	18.4921	89.8696	57.219	89.3988	85.9616	26.1206	96.1552	27.1651
111	m	12	m_12	72.4363	37.3063	100.324	84.2194	36.3723	71.6109	92.5847	99.228	87.2167	28.293	106.155	66.351	97.5813	77.6685	25.3667	79.5937	31.8702
112	m	12	m_12	72.6235	38.4104	100.534	78.646	24.4097	67.3766	83.2072	98.9105	86.6986	25.7302	95.9728	64.4437	91.0187	76.2591	27.1956	83.784	32.4592
166	m	12	m_12	74.9623	41.9522	100.412	67.7992	37.6692	71.5137	88.1499	99.0875	89.4793	23.1493	98.5142	62.9346	89.6469	91.2813	29.4516	101.823	28.9243
169	m	12	m_12	75.4696	40.4728	100.202	70.5469	40.9862	66.715	90.4272	98.9	89.0978	30.786	101.492	64.0643	91.7721	80.3067	28.2533	87.5066	32.287
170	m	12	m_12	75.8321	41.4219	99.9983	68.9361	29.2659	71.1815	88.5002	98.3918	93.0108	26.4056	95.1506	63.2368	94.1895	80.659	27.8097	85.6348	32.4748
172	m	12	m_12	74.7349	41.476	100.113	68.2664	35.9049	67.713	95.6909	99.3313	94.0168	20.2214	101.781	62.3295	90.0348	81.8339	28.7131	90.8914	31.5906
173	m	12	m_12	81.4747	40.6984	100.442	72.5383	34.1812	70.7719	85.4866	97.8852	96.6151	23.5428	88.4816	59.63	96.3231	79.7423	25.1948	82.7863	30.4336
197	m	12	m_12	74.3032	39.823	99.3911	75.4898	39.0292	64.4334	93.4144	99.276	90.2952	22.8209	103.454	61.3478	81.6612	78.9289	29.917	96.6541	30.9526
198	m	12	m_12	72.2758	39.423	100.38	76.0477	32.7736	66.7208	86.0687	98.4407	91.8894	25.7652	93.6655	63.4547	88.8559	82.0753	28.1531	92.369	30.479
202	m	12	m_12	73.8554	38.9633	100.262	77.7196	33.6177	65.0212	86.9784	98.4398	90.4826	26.6856	96.1272	56.315	85.9906	81.1636	25.517	94.3866	27.0345
204	m	12	m_12	74.2826	43.6736	99.8084	62.8313	40.5145	58.2023	92.6186	99.2451	87.4906	20.0561	105.861	62.4988	90.4235	89.8179	30.1862	99.3303	30.3898
205	m	12	m_12	72.1611	39.7504	99.5756	75.976	28.2627	59.306	88.6873	99.1459	90.4498	30.6442	98.0514	59.2474	85.7861	75.9622	27.4533	88.5484	31.0037
207	m	12	m_12	80.5539	45.7244	100.296	58.911	30.5363	64.0211	92.6093	98.8479	93.66	25.1288	98.8782	61.0552	98.1752	79.3279	28.436	80.8024	35.192
211	m	12	m_12	77.9825	38.0698	100.464	81.6858	28.8496	67.1909	91.9686	99.1932	96.3496	15.0898	95.453	59.0413	83.6631	73.3938	26.866	87.7255	30.6251
214	m	12	m_12	71.956	41.5912	100.281	72.697	35.2987	65.2158	88.5612	99.0117	84.4123	21.7168	104.915	56.5379	99.0166	94.5153	23.7484	95.454	24.8794
222	m	12	m_12	74.2042	43.1707	100.355	65.8015	31.7281	64.9339	90.572	98.761	91.8293	28.5736	98.6307	61.7871	95.62	84.0934	27.8958	87.9455	31.7194
229	m	12	m_12	72.836	40.097	100.425	71.7844	33.3056	64.0261	95.1114	99.2897	90.026	35.4191	105.649	61.0585	79.6113	73.3673	30.7527	92.1569	33.37
239	m	12	m_12	72.6544	43.2975	100.275	63.0594	35.8866	64.668	79.765	99.1708	81.516	25.5141	97.8519	59.3986	90.804	92.367	28.3227	101.721	27.8434
241	m	12	m_12	77.295	43.1048	100.187	63.8265	33.8048	66.1543	92.6632	98.8989	93.4997	24.8796	99.1054	60.5546	98.7552	72.8814	26.4309	73.8	35.8143
252	m	12	m_12	76.5282	41.201	100.201	69.5552	31.7832	66.649	91.2495	98.964	94.7083	26.739	96.348	63.0697	89.7292	78.1987	28.9597	87.1497	33.2299
253	m	12	m_12	73.3689	45.6505	100.258	58.1059	26.0243	65.603	89.3835	98.8426	94.3853	23.6631	94.7007	61.6132	96.0602	87.0362	29.2803	90.6058	32.3161
263	m	12	m_12	71.7918	41.5692	99.8263	71.6015	34.8038	66.0396	92.1176	99.0264	91.7338	25.1772	100.418	65.4072	85.3374	79.2978	31.8609	92.9228	34.2875
265	m	12	m_12	76.6669	40.1821	100.178	75.772	27.3755	68.9159	94.9069	99.4145	91.3118	24.0762	103.937	60.5252	81.9619	71.3765	29.6727	87.0849	34.0733
268	m	12	m_12	72.6189	46.7573	99.768	58.765	31.2842	63.9313	96.6765	99.2667	88.9377	28.6469	108.701	59.3248	92.1526	83.6852	30.1008	90.8116	33.1464
278	m	12	m_12	74.2334	45.4557	100.188	58.9122	28.3277	73.3585	95.3343	99.3912	93.4096	19.6298	102.061	62.1147	116.681	84.815	24.1982	72.6898	33.2897
279	m	12	m_12	72.2223	41.1815	99.7403	72.3291	36.764	70.395	98.5231	99.0988	90.8792	22.6799	108.411	60.2456	77.5575	66.6064	31.9892	85.8799	37.2487
281	m	12	m_12	76.1898	39.6348	98.9059	76.0149	47.4013	66.0507	86.3643	98.4629	91.8788	31.4345	93.9981	58.6276	87.297	82.3271	26.6182	94.3069	28.2251
282	m	12	m_12	80.0613	46.1168	100.422	54.1181	32.1672	64.1872	94.9266	99.3724	94.9022	24.5692	100.026	59.7954	107.823	88.3186	25.5751	81.9109	31.2231
285	m	12	m_12	71.1755	38.339	99.6735	79.3107	27.3267	60.4995	92.2276	98.9403	91.4967	26.8485	100.799	57.3789	88.4571	80.1466	24.8691	90.605	27.4479
286	m	12	m_12	76.5436	42.3371	100.298	66.236	36.4076	70.4966	87.2349	97.7765	94.7124	20.5285	92.1051	59.7535	101.285	93.4379	24.977	92.2526	27.0746
289	m	12	m_12	72.3839	36.6876	100.29	85.4294	36.6235	61.8499	85.7863	99.0868	86.6149	20.0663	99.0434	59.75	85.4836	76.4032	25.6433	89.3776	28.691
293	m	12	m_12	76.4554	39.7745	100.203	75.6417	34.437	69.9797	94.2311	99.3242	89.5526	23.1628	105.224	64.5544	89.6103	78.7432	28.6531	87.8728	32.6075
295	m	12	m_12	74.3028	40.8614	100.37	69.7282	26.3455	63.8907	98.854	98.4733	85.437	29.6595	115.704	64.5706	91.3271	76.335	28.89	83.5842	34.564
296	m	12	m_12	75.8455	43.634	100.405	65.1435	33.4571	65.7187	84.351	98.377	88.6304	22.9579	95.1717	62.3507	90.5851	80.4435	30.0337	88.8044	33.8201
298	m	12	m_12	78.3262	45.2441	100.246	58.6238	35.5161	64.5667	93.2971	99.2194	95.2817	24.3034	97.9171	59.7981	100.827	79.9933	26.8332	79.3371	33.8217
303	m	12	m_12	72.4307	42.0223	100.402	70.4054	42.3122	63.4919	92.107	99.0302	94.3149	22.079	97.6589	60.6035	92.1197	85.577	27.6455	92.8976	29.7592
320	m	12	m_12	77.1996	44.7025	100.233	62.2975	35.1723	67.6081	83.7201	99.1926	83.092	29.5595	100.756	62.3503	92.647	99.1829	30.0842	107.055	28.1018
323	m	12	m_12	73.5512	45.7833	99.4946	60.645	31.9713	64.7158	96.0592	99.3937	92.0194	18.7007	104.39	58.6996	97.7906	80.1135	27.4818	81.9235	33.5457
324	m	12	m_12	74.3306	45.441	99.9891	57.5727	29.7457	65.7682	84.9183	98.9552	83.1672	24.1361	102.105	59.4545	94.2558	86.0646	28.6632	91.3096	31.3912
331	m	12	m_12	75.9706	43.4492	100.251	64.7513	32.0324	66.2371	92.5209	99.3646	94.1295	21.3131	98.2911	57.7156	96.5719	67.8644	25.9672	70.2734	36.9516
333	m	12	m_12	81.2356	40.7391	100.374	73.2703	33.0664	59.6296	87.3257	98.5686	91.0915	19.879	95.8659	57.553	89.2569	81.1322	26.2686	90.8974	28.8992
334	m	12	m_12	74.258	43.4067	100.086	64.0805	31.5041	64.3406	93.3655	99.3805	88.326	28.275	105.706	59.541	93.4599	76.8429	27.6533	82.2202	33.6332
354	m	12	m_12	75.3427	41.5752	100.074	70.8406	28.0688	63.2235	88.8046	98.5766	91.314	26.5947	97.2518	59.381	97.6829	82.4582	25.2734	84.4141	29.9397
379	m	12	m_12	75.1077	37.4511	100.503	80.0081	30.7723	65.6596	84.2009	96.233	97.0313	18.3886	86.777	63.4199	85.7003	67.8903	27.7145	79.2183	34.985
398	m	12	m_12	75.9223	42.811	100.025	64.984	30.2127	64.2105	90.9859	98.7559	93.253	21.1325	97.5689	63.5548	97.8503	79.2113	27.8062	80.9516	34.3492
406	m	12	m_12	81.1088	45.795	100.538	58.7845	27.7371	62.9761	86.5828	97.384	98.09	24.3764	88.2687	59.8063	95.9634	88.7983	28.5403	92.5335	30.8433
407	m	12	m_12	76.2996	41.1219	100.011	69.7837	42.3727	68.6041	83.626	98.6307	91.0005	31.6405	91.8962	60.123	95.6055	79.1707	25.8602	82.8098	31.2284
410	m	12	m_12	73.0656	41.4856	99.9951	72.4878	40.1583	64.7367	92.9557	99.2516	86.6376	21.9641	107.293	63.5375	97.478	89.6403	27.0409	91.9595	29.4052
420	m	12	m_12	78.5678	44.5183	100.347	61.215	34.3164	67.2204	87.3594	97.5664	95.8323	23.3588	91.1586	64.285	94.3483	91.1421	30.3329	96.6018	31.3999
421	m	12	m_12	80.0852	44.3273	99.9065	63.326	30.568	70.3176	85.9077	99.0039	89.0341	22.4872	96.4886	58.5916	95.2042	77.7176	27.2804	81.6326	33.4185
427	m	12	m_12	73.4123	39.4382	100.562	74.0175	32.0246	69.8678	90.9668	98.7272	90.8064	27.0568	100.177	61.7074	76.4268	76.1162	31.8426	99.5935	31.9726
428	m	12	m_12	77.5626	43.9925	99.7784	62.382	28.6738	67.9467	91.2493	99.1514	91.4285	25.1716	99.804	55.7632	95.6336	90.4192	25.6517	94.5475	27.131
429	m	12	m_12	71.6801	40.1042	100.137	76.8634	31.7051	69.0552	87.3406	98.5171	89.8371	26.5497	97.2211	65.0493	87.3246	83.8361	29.8742	96.0051	31.1173
434	m	12	m_12	68.0149	40.3864	99.5517	75.4305	34.1801	60.0214	90.3504	98.8251	86.6625	23.7082	104.256	61.2741	94.637	81.2921	26.1487	85.8989	30.4413
435	m	12	m_12	73.8513	39.9887	100.408	74.0063	25.4472	66.8896	91.9337	98.7248	86.9325	27.456	105.753	65.835	102.838	88.4734	25.6	86.0318	29.7565
436	m	12	m_12	78.889	41.3607	100.216	65.6965	30.9061	67.0579	88.4338	99.0561	91.6498	21.6655	96.491	57.2701	89.4901	74.9913	26.4692	83.7984	31.5867
437	m	12	m_12	75.1898	41.279	99.3193	75.0901	40.6981	64.976	86.1971	98.6747	90.8355	26.7735	94.8936	56.7039	81.7521	78.3826	28.6314	95.8784	29.8622
439	m	12	m_12	78.7083	41.5064	100.531	68.5011	27.5191	62.8046	86.5334	98.5887	87.8675	27.6515	98.4817	65.3001	90.4266	83.3188	29.9732	92.1398	32.5301
441	m	12	m_12	74.6435	41.4916	100.31	71.3929	33.214	67.0196	96.4505	99.3079	89.5873	18.8518	107.661	63.0476	88.1332	77.412	29.6818	87.8353	33.7925
442	m	12	m_12	78.3686	38.1032	100.238	76.8673	39.2989	61.4167	85.681	97.5308	93.6294	22.8203	91.5107	57.2707	86.0796	72.1723	25.3509	83.8436	30.236
443	m	12	m_12	76.3066	45.1973	100.266	60.5051	32.632	64.5537	91.1234	99.3418	88.6081	24.3403	102.839	60.0244	104.477	80.1224	25.967	76.6891	33.86
446	m	12	m_12	75.2157	41.0008	99.993	71.0442	31.2376	59.3026	98.2615	99.0859	88.1884	30.247	111.422	65.5565	96.1884	77.1307	27.9438	80.1872	34.8482
456	m	12	m_12	80.7153	42.1262	100.176	64.346	32.3849	60.9513	85.8502	98.8942	88.4303	21.5272	97.0823	55.9631	92.0359	76.5815	25.6152	83.2083	30.7844
457	m	12	m_12	71.0811	47.2731	100.154	53.7695	30.9377	66.035	94.6859	99.3881	89.2619	30.0686	106.077	60.4927	100.451	89.7494	28.4685	89.3467	31.8629
460	m	12	m_12	79.0261	40.0029	100.263	73.7324	33.4501	66.628	82.4996	97.5644	90.4152	29.1531	91.2452	57.7041	82.4032	79.8272	28.0126	96.8739	28.9166
467	m	12	m_12	78.2086	44.3493	100.33	59.9904	31.2584	63.6588	90.4683	99.2643	92.8846	20.0532	97.3986	59.8645	98.1308	72.6138	27.0552	73.9969	36.5626
469	m	12	m_12	74.3904	43.175	100.115	64.9591	29.5517	66.9277	89.1232	99.2824	87.6294	26.851	101.705	61.0556	100.815	91.3618	26.1476	90.6232	28.8531
476	m	12	m_12	73.7902	39.9295	100.184	75.082	35.1438	61.1777	90.5907	98.7656	91.0463	23.6016	99.4996	59.8354	94.4026	80.3029	25.3086	85.0642	29.7523
494	m	12	m_12	74.6339	45.412	100.426	58.1402	36.4423	70.7662	89.8198	99.1617	87.9295	27.1525	102.15	63.205	100.691	86.8691	28.5056	86.2727	33.0413
503	m	12	m_12	71.8811	41.1686	100.36	71.0864	41.2977	70.3084	85.7789	98.7897	87.6686	18.6619	97.8446	67.4835	95.8752	90.7552	28.9773	94.6598	30.612
505	m	12	m_12	75.7347	45.0575	100.432	59.0043	39.3246	69.9666	92.882	99.1375	94.1365	21.8084	98.6674	63.6186	89.3998	74.9471	32.0638	83.8336	38.2469
506	m	12	m_12	77.26	40.8507	100.253	71.5793	39.2527	70.2031	94.4686	99.2649	95.8198	24.1876	98.5898	57.3654	90.2916	68.6652	25.9539	76.0483	34.1281
508	m	12	m_12	78.2023	43.0109	100.057	64.1826	34.5559	62.5958	90.1479	98.394	93.4773	22.8022	96.4383	64.4142	96.3852	78.6941	28.7441	81.6454	35.2061
509	m	12	m_12	76.0928	42.4992	100.419	65.8455	33.1485	67.9638	89.8022	99.1387	90.363	22.263	99.3794	59.6963	87.7464	77.7789	28.9134	88.6406	32.6187
522	m	12	m_12	74.5037	45.4765	100.398	56.7982	37.8292	71.0197	90.0016	98.7725	96.2194	22.0076	93.5378	54.963	81.2663	81.3312	30.7572	100.08	30.7327
524	m	12	m_12	70.7263	40.1154	100.449	72.2073	35.5179	68.0239	93.6219	99.1841	91.548	26.28	102.265	62.3866	83.4217	72.3448	30.0002	86.7219	34.5935
525	m	12	m_12	76.9021	43.4244	100.51	62.982	35.9728	66.2925	89.3431	99.3509	82.7722	25.4064	107.939	58.5867	89.3331	84.8131	28.4787	94.9403	29.9964
526	m	12	m_12	78.6627	40.141	100.481	73.9649	42.4813	74.0758	91.2869	99.0286	93.5965	29.5578	97.5323	58.8575	90.1014	75.4175	26.2216	83.7029	31.327
530	m	12	m_12	76.4614	42.0075	99.9478	69.2524	38.2307	64.5712	94.5906	99.4452	93.4934	23.1071	101.174	60.6817	87.7712	62.9563	29.0424	71.7278	40.4897
545	m	12	m_12	73.7925	45.3658	100.234	58.302	40.6943	62.0934	94.5443	99.0602	95.5739	24.1855	98.9226	60.6642	95.9574	84.9068	28.6802	88.4839	32.4129
560	m	12	m_12	73.025	45.1931	100.417	58.4287	35.0002	58.1487	90.2698	99.2994	86.2762	29.5624	104.629	62.7037	91.8212	85.6584	30.8619	93.2883	33.0823
574	m	12	m_12	74.3737	44.4645	100.202	57.8075	40.5614	65.4942	95.3982	99.14	96.3765	27.8828	98.9849	61.3919	90.3532	75.2768	30.2121	83.3139	36.263
582	m	12	m_12	78.822	43.7716	100.104	62.3916	36.2528	64.2114	81.8327	98.4481	92.0166	23.7134	88.9325	59.4677	94.9912	85.175	27.4025	89.6662	30.5606
586	m	12	m_12	81.4402	38.743	100.23	78.778	30.8725	61.9492	94.1409	99.0325	93.9854	21.7349	100.165	61.0977	93.3176	88.2861	25.3662	94.6082	26.8118
588	m	12	m_12	78.8169	42.8149	100.312	67.2168	30.306	62.5212	89.7366	99.2938	90.7645	21.2425	98.8675	60.4712	84.6624	79.1625	30.5811	93.5038	32.7058
602	m	12	m_12	72.9283	41.1636	100.07	71.2682	36.7904	68.867	90.8493	99.3241	92.2101	29.2317	98.5242	61.6955	81.9396	72.7268	30.9937	88.7566	34.9198
611	m	12	m_12	74.0715	43.4772	100.54	63.2882	26.3935	63.2519	95.1083	99.3345	90.2961	20.9084	105.329	57.7779	90.4565	75.7547	27.7705	83.7471	33.1599
613	m	12	m_12	78.6371	45.0801	100.451	60.6795	30.977	65.8531	90.5638	99.3342	91.4855	16.299	98.9926	55.1054	101.184	77.7221	24.5508	76.8123	31.962
616	m	12	m_12	82.8885	41.741	100.456	69.981	32.3925	71.3238	86.2399	98.893	94.1568	22.2133	91.5918	54.9648	85.1962	84.0033	26.9295	98.5999	27.3119
620	m	12	m_12	70.7061	45.5843	100.569	58.2512	31.2025	65.031	88.2594	98.7375	92.5476	27.5556	95.3664	61.0649	98.1552	90.1815	28.3592	91.8765	30.8667
622	m	12	m_12	77.4293	42.8609	100.049	66.1338	34.9751	70.9682	93.3295	99.3633	91.6979	23.4894	101.779	58.6556	99.3974	80.4189	25.2927	80.9064	31.2617
631	m	12	m_12	80.4122	40.3486	99.4753	73.8803	44.2163	61.6166	94.8446	99.2932	87.2201	26.6482	108.742	65.1046	93.9265	78.7726	27.9674	83.8662	33.3477
641	m	12	m_12	73.8729	39.3279	100.212	74.2473	39.6067	68.7841	91.1393	99.1538	92.5884	21.6801	98.435	60.2565	81.8491	68.9914	28.9528	84.291	34.3486
642	m	12	m_12	77.4847	41.425	100.332	69.7025	29.2739	65.6885	83.3159	97.8324	92.8041	21.9112	89.7761	56.6043	85.4615	74.2607	27.4373	86.8938	31.5757
649	m	12	m_12	77.2403	43.5687	100.474	64.6427	30.8428	63.0486	96.0498	99.3536	90.6762	20.8704	105.926	63.6287	107.596	79.4252	25.765	73.8177	34.9035
651	m	12	m_12	73.1046	41.7678	99.9178	70.6169	27.3318	58.5844	87.6192	98.2168	93.1278	24.6458	94.0849	63.8257	87.654	78.4848	30.4134	89.5393	33.9666
002	m	15	m_15	76.4821	41.0242	99.964	70.9431	33.1502	61.6784	86.8153	99.5181	95.2789	27.1408	91.117	59.1777	100.864	91.3019	24.0693	90.5203	26.59
005	m	15	m_15	76.4766	40.1067	99.5728	74.6697	30.1971	66.7583	94.8519	100.583	84.9587	30.2794	111.645	60.6458	85.119	78.094	28.5754	91.7469	31.1459
006	m	15	m_15	77.0502	42.0207	99.9047	69.5262	29.9441	65.6692	87.7419	99.1046	96.2148	21.1609	91.1937	59.5872	96.7802	88.3433	25.872	91.2825	28.3428
010	m	15	m_15	75.3127	42.0223	99.3228	66.7073	36.1805	60.1983	93.796	100.506	92.7981	23.4552	101.075	59.4449	94.4679	72.8876	26.443	77.156	34.2721
011	m	15	m_15	77.3716	38.299	99.2215	80.1197	38.2804	67.2732	96.8938	100.563	84.304	31.7513	114.934	61.4579	82.1483	75.6544	28.6528	92.0949	31.1123
015	m	15	m_15	78.2884	37.9995	99.9616	79.9009	31.8374	63.0974	95.6373	100.463	90.994	25.9408	105.103	60.212	99.1314	71.2545	23.0808	71.8788	32.1107
016	m	15	m_15	75.8996	43.4122	99.9953	65.5805	29.9069	64.5196	91.4957	99.8951	90.3534	23.9079	101.264	63.993	102.321	96.4928	27.1505	94.3036	28.7905
023	m	15	m_15	84.2159	40.9733	99.7209	71.2841	33.3164	63.0859	94.139	100.066	96.791	23.1012	97.2601	57.7527	88.993	73.2266	26.59	82.2836	32.315
034	m	15	m_15	79.6775	41.2756	99.8866	72.1918	25.9718	55.9714	85.4876	99.7096	90.2089	23.5159	94.7662	57.7592	83.1823	88.8315	28.6605	106.791	26.8378
045	m	15	m_15	72.5495	40.7915	99.7481	71.671	34.5339	60.683	95.102	100.733	81.8842	28.505	116.142	63.8016	84.6611	84.6417	30.741	99.977	30.7481
054	m	15	m_15	79.0793	39.5043	99.5665	76.9698	33.1551	64.6153	94.1225	100.576	94.1462	25.1194	99.9748	67.1977	87.224	72.2111	30.4343	82.7882	36.7616
059	m	15	m_15	79.8367	40.5264	99.7541	73.2457	36.0703	61.4577	96.001	100.642	88.9422	29.7047	107.936	61.7586	98.9459	83.0241	25.2951	83.9086	30.1461
071	m	15	m_15	75.2948	44.9549	99.4983	59.7782	40.127	63.3755	94.3503	100.647	84.746	27.2034	111.333	57.4618	93.2617	87.0283	27.6983	93.3163	29.6821
072	m	15	m_15	78.5482	41.1268	99.2253	74.0118	38.736	62.193	99.0784	100.419	88.7126	23.4809	111.685	62.328	96.5501	88.5353	26.5494	91.6988	28.9529
076	m	15	m_15	70.8936	46.2847	99.2158	58.0901	37.0442	59.3497	91.3681	100.52	87.3291	31.862	104.625	60.1007	99.5579	88.8325	27.941	89.227	31.3145
084	m	15	m_15	74.857	41.1176	99.7827	70.8618	25.8468	67.9834	87.7908	99.8624	91.7041	30.3053	95.7327	62.7669	85.4485	86.7596	30.2033	101.534	29.7469
085	m	15	m_15	75.3411	42.8861	99.6632	66.7705	37.5979	60.7483	92.697	99.0949	100.013	24.7545	92.685	56.3264	93.2432	84.3069	25.9066	90.4162	28.6526
086	m	15	m_15	77.4404	36.5305	99.5247	86.2749	29.7861	63.553	97.6891	100.491	91.6528	18.2825	106.586	60.1296	73.3396	57.4054	29.9506	78.2733	38.2641
098	m	15	m_15	79.1486	46.0886	99.337	59.3549	37.886	59.0705	89.4135	100.586	90.63	25.5636	98.6577	59.4975	104.222	91.0471	26.3107	87.3588	30.118
105	m	15	m_15	76.4116	43.1116	99.9169	65.6748	34.4847	70.239	91.3656	100.181	92.9511	22.027	98.2943	58.568	103.223	84.1851	24.4611	81.5563	29.9929
110	m	15	m_15	83.8941	43.3106	99.8774	64.8029	29.9781	66.0264	88.1047	99.5028	95.9792	20.6174	91.7956	57.5	89.8888	89.8373	27.7049	99.9427	27.7207
111	m	15	m_15	78.4439	38.8863	99.8853	79.9656	36.395	65.7304	97.8196	100.537	93.6709	24.8508	104.429	66.4973	98.908	69.785	26.1438	70.5555	37.0543
112	m	15	m_15	71.9295	39.4706	99.9299	75.647	28.4894	64.7768	90.4671	100.638	85.8285	29.6266	105.404	63.7577	90.3815	78.9377	27.8437	87.3384	31.8803
166	m	15	m_15	75.4495	42.1546	99.9105	66.865	36.5678	66.188	86.7608	100.272	90.2575	24.4924	96.1259	63.0376	91.3368	98.5258	29.0937	107.871	26.9708
169	m	15	m_15	81.4137	41.2698	99.9099	69.7789	35.6739	71.5233	87.9435	99.5896	93.3012	28.2725	94.2576	64.8676	87.3286	77.3937	30.6552	88.6236	34.5903
170	m	15	m_15	76.8408	41.3869	99.5985	69.2183	28.3439	64.7339	93.6949	100.243	92.9697	26.0362	100.78	62.7675	95.3352	78.3981	27.2486	82.2342	33.1354
172	m	15	m_15	76.1657	45.008	99.1635	59.3972	28.4547	62.6847	99.9194	100.001	90.2317	18.4626	110.736	59.4075	88.4633	74.8981	30.2251	84.6657	35.6993
173	m	15	m_15	81.1259	42.7506	99.982	66.424	34.2346	65.3956	96.0028	100.46	98.1975	25.6671	97.765	59.8786	98.5901	74.848	25.9646	75.9184	34.2006
197	m	15	m_15	79.9144	40.122	98.9956	75.5585	38.9862	63.2332	94.2508	100.098	92.7703	24.2174	101.596	61.3948	82.413	72.6324	29.8895	88.1323	33.9144
198	m	15	m_15	71.9711	39.4241	99.3613	75.8869	33.6716	54.8771	92.2537	100.429	92.4352	24.7885	99.8036	65.2084	84.7478	73.2564	30.3345	86.4404	35.093
202	m	15	m_15	71.3401	40.3684	99.5595	74.3768	36.5648	62.9533	95.4296	100.643	88.1539	25.4471	108.253	58.167	92.264	82.0703	25.4499	88.9515	28.6109
204	m	15	m_15	71.9605	44.2453	98.8938	63.3492	40.4576	55.1541	99.3989	99.6578	86.8719	19.8469	114.42	62.2634	92.4315	89.1988	29.8044	96.5026	30.8845
205	m	15	m_15	72.3234	40.6505	98.8398	72.754	30.5441	56.9001	95.1019	100.637	88.4981	30.2848	107.462	59.8404	89.9472	76.7271	27.0441	85.3024	31.7038
207	m	15	m_15	78.8472	46.4414	99.3836	60.1538	29.9152	58.8517	96.3085	100.503	91.2716	25.0096	105.519	62.4336	100.693	87.1723	28.7954	86.572	33.2617
211	m	15	m_15	74.6594	38.7686	99.8716	79.1779	34.9844	64.0608	86.0019	99.316	95.011	24.5228	90.5178	58.1428	86.1932	82.541	26.1519	95.7628	27.309
214	m	15	m_15	74.3811	40.1902	99.8225	74.4931	32.7856	60.9261	90.9489	100.439	90.0135	23.2383	101.039	58.2147	92.9154	83.4105	25.1806	89.7704	28.05
222	m	15	m_15	73.4807	43.0538	99.6687	63.0209	31.1756	59.7694	89.7023	99.332	95.6664	28.9017	93.7657	62.9317	97.9472	85.8057	27.6623	87.6041	31.5765
229	m	15	m_15	72.5659	41.1621	99.6425	70.6719	37.4602	61.5355	90.6984	100.624	88.1936	38.2553	102.84	62.2162	84.5251	81.813	30.298	96.7913	31.3024
239	m	15	m_15	71.6047	43.8035	99.6142	64.412	35.7245	62.4085	91.1239	100.784	86.3844	30.7128	105.487	59.4427	91.3195	98.0932	28.5131	107.418	26.5441
241	m	15	m_15	75.7696	42.9373	99.0105	66.0246	38.8662	68.0273	97.5279	100.55	90.0283	26.9816	108.33	60.8537	100.808	77.4101	25.9196	76.7898	33.7539
252	m	15	m_15	75.0902	41.5647	99.2333	71.3146	36.8968	58.578	95.6577	100.586	91.9752	26.25	104.004	62.0036	92.6928	77.549	27.8032	83.6623	33.2327
253	m	15	m_15	75.6013	47.3083	99.7412	56.2129	31.5331	63.1969	92.6031	100.34	95.3868	24.6286	97.0817	58.5088	93.7305	89.7448	29.5309	95.7477	30.8424
263	m	15	m_15	75.5366	41.5036	99.5347	71.7961	31.8481	56.0976	95.9534	100.382	95.3399	22.7958	100.643	64.9552	88.7432	80.4528	30.3783	90.6579	33.5087
265	m	15	m_15	70.9631	39.9108	99.7331	78.4507	30.1031	62.1184	92.8303	100.577	91.1613	26.349	101.831	60.686	84.1604	80.1056	28.7787	95.182	30.2354
268	m	15	m_15	74.5988	47.1698	99.2689	57.413	32.1555	65.0757	95.5518	100.576	88.9938	31.1283	107.369	58.7415	93.66	88.7401	29.5839	94.747	31.2241
278	m	15	m_15	79.3545	44.8197	99.7879	60.8059	29.3961	68.1436	85.554	100.38	85.7482	29.4852	99.7735	62.5332	109.81	92.6072	25.5233	84.3339	30.2645
279	m	15	m_15	79.0022	40.579	99.3353	74.6226	35.3214	67.2844	97.5123	100.586	92.796	27.4746	105.082	60.9079	72.8229	67.686	33.9396	92.9461	36.5154
281	m	15	m_15	71.4427	39.3224	98.704	78.6121	40.2757	64.0303	99.5979	98.785	86.7343	27.8526	114.831	59.6959	88.4	77.2129	26.5541	87.3449	30.4015
282	m	15	m_15	78.8041	42.1048	99.7627	68.248	33.5753	65.0307	93.0935	100.179	96.6503	21.5775	96.32	60.1646	101.062	78.6634	25.066	77.837	32.2033
285	m	15	m_15	74.1604	37.9642	99.6833	82.162	24.3152	72.115	86.6762	99.3458	91.5296	24.4278	94.6975	59.0142	85.9361	84.1472	26.0709	97.9183	26.6251
286	m	15	m_15	76.0551	43.0029	99.7324	66.8175	31.4526	65.6597	85.6417	99.0662	97.2127	17.9937	88.0972	60.5966	102.386	86.9766	25.4511	84.9499	29.9601
289	m	15	m_15	73.1612	37.6791	99.7594	83.3446	38.456	64.6676	85.9291	100.477	83.7759	24.9904	102.57	61.8536	81.2463	81.2118	28.6855	99.9575	28.6977
293	m	15	m_15	77.7405	46.6447	99.3107	56.6274	33.6214	68.6407	94.0569	100.348	93.6389	25.7777	100.446	58.6159	101.832	78.0547	26.8493	76.6505	35.0282
295	m	15	m_15	70.9975	42.9676	99.9317	62.4044	26.2209	58.7264	98.1203	100.61	83.5474	26.1658	117.443	62.6734	98.6231	83.4219	27.3052	84.5866	32.2808
296	m	15	m_15	77.8549	45.7883	99.9901	60.19	28.9235	62.8938	84.7654	98.7418	90.8925	24.327	93.2589	60.9399	97.4365	88.4513	28.6375	90.7784	31.5466
298	m	15	m_15	80.6625	46.5368	99.73	56.3887	30.867	65.9359	96.2865	100.564	92.738	25.619	103.826	61.9039	113.233	93.1794	25.4414	82.2898	30.9169
303	m	15	m_15	73.5867	41.4161	99.9394	70.0991	37.9024	61.6675	89.3604	99.8038	95.4742	23.6062	93.5964	63.5562	93.4153	81.918	28.1779	87.6923	32.1327
320	m	15	m_15	77.6836	44.7555	99.703	63.133	34.4083	66.65	87.3845	100.59	90.0198	26.484	97.0725	63.8818	95.3993	97.1937	29.9694	101.881	29.4161
323	m	15	m_15	76.3621	46.1301	99.3048	58.1664	37.6803	64.6627	90.5439	100.338	94.0642	23.9774	96.2575	61.0838	99.3077	89.6457	28.3745	90.2707	31.4326
324	m	15	m_15	77.8017	42.1229	99.7319	67.2832	34.9784	64.6543	83.6564	99.2209	92.3227	19.5285	90.613	60.3695	92.5542	76.6127	27.4751	82.7761	33.1921
331	m	15	m_15	78.4006	43.4737	99.6486	62.4233	29.925	64.5502	95.2965	100.543	93.6051	17.4375	101.807	58.8459	93.4719	72.1239	27.3692	77.1611	35.4702
333	m	15	m_15	81.9618	40.9141	99.918	71.4735	30.4898	57.467	91.2823	100.006	94.6283	20.1466	96.4641	57.9431	93.6362	75.7566	25.3181	80.9053	31.2936
334	m	15	m_15	77.833	40.9948	99.8268	71.4309	30.5213	66.4486	98.0893	100.531	89.9933	25.5285	108.996	60.2516	92.7758	76.5646	26.6234	82.5266	32.2604
354	m	15	m_15	75.6456	42.1651	99.6924	69.3181	32.1664	62.0093	92.7366	100.58	90.8521	27.0707	102.074	60.5483	94.2446	81.7479	27.0893	86.7402	31.2305
379	m	15	m_15	73.3497	37.8551	99.8539	81.1174	34.4387	62.0647	85.277	99.9274	89.623	19.6521	95.1508	63.9364	89.0458	72.9054	27.1806	81.874	33.1981
398	m	15	m_15	76.5165	42.5675	99.6715	65.7518	35.1877	61.5556	88.2417	100.151	90.1045	21.3608	97.9327	64.9269	98.8284	90.7734	27.9654	91.8496	30.4469
406	m	15	m_15	83.2727	45.2347	99.9776	60.0922	32.4447	65.0811	90.1634	99.7865	96.4652	23.9148	93.4672	61.8809	97.8425	85.4434	28.6089	87.3275	32.7605
407	m	15	m_15	72.1088	40.3998	99.5477	74.3721	38.854	69.4661	82.1792	99.9932	89.7534	28.5947	91.5611	61.5247	99.2368	84.5014	25.047	85.1513	29.4147
410	m	15	m_15	77.3179	41.0743	99.5997	72.6726	38.6989	63.7114	95.0914	100.63	88.5787	21.3008	107.352	63.3355	95.0547	83.9146	27.3681	88.2803	31.0013
420	m	15	m_15	79.4934	45.149	99.8278	60.2273	36.2587	62.0467	93.8953	100.539	94.7477	26.9971	99.1003	61.9312	94.8752	90.335	29.4716	95.2146	30.9529
421	m	15	m_15	78.5597	45.5282	99.2989	60.2035	32.0126	68.8984	87.8045	99.7289	93.5189	20.3864	93.8896	57.0333	95.4809	76.7909	27.1952	80.4253	33.8142
427	m	15	m_15	74.6821	39.8584	99.9617	73.7267	33.4822	68.2062	98.1341	100.652	89.6216	27.15	109.498	62.1961	77.997	76.2296	31.7837	97.734	32.5207
428	m	15	m_15	86.6334	44.1321	99.1947	63.1617	29.5913	63.4395	91.643	100.088	95.6522	24.0723	95.8086	54.0205	97.6178	85.7505	24.4222	87.8431	27.8021
429	m	15	m_15	79.0394	41.0536	99.6794	72.3905	29.105	62.4796	94.357	100.265	97.5869	31.5843	96.6903	64.7748	95.5373	88.2863	27.8345	92.4103	30.1206
434	m	15	m_15	77.4917	40.713	99.7452	73.2828	26.1411	65.782	85.1975	99.2485	91.1734	24.9086	93.4456	59.8517	88.4503	78.322	27.5493	88.5492	31.1118
435	m	15	m_15	72.482	40.1036	99.8262	76.8337	35.2227	63.8188	95.5256	100.658	88.1306	28.1168	108.391	66.2101	95.3353	88.6886	27.8519	93.0281	29.9392
436	m	15	m_15	79.792	38.3821	99.5534	79.139	23.5825	62.1893	84.4774	100.124	90.8997	20.4985	92.9347	60.1414	86.597	71.2186	26.6562	82.2414	32.4122
437	m	15	m_15	76.4669	39.829	98.3434	78.975	46.0428	64.6399	92.6864	100.594	88.9751	31.3655	104.171	61.1699	81.0238	75.4719	30.0694	93.1479	32.2814
439	m	15	m_15	78.163	43.8929	99.9729	63.7844	30.9682	61.8365	95.3248	100.723	89.5668	29.0132	106.429	64.3755	97.4603	92.5699	28.9926	94.9821	30.5243
441	m	15	m_15	75.5814	41.676	99.8643	68.5357	34.8714	66.5202	93.4078	100.407	93.0295	20.2216	100.407	63.7002	89.2438	79.3951	29.7474	88.9643	33.4374
442	m	15	m_15	80.0862	37.9657	99.5026	80.4732	40.4995	61.0093	98.4598	100.541	91.4145	21.4721	107.707	59.0183	86.9534	66.7294	25.7686	76.7416	33.5784
443	m	15	m_15	73.9691	44.3917	99.1102	63.2864	39.3412	61.9183	97.9432	100.275	87.5512	25.5759	111.87	57.5355	93.9073	74.1486	27.1981	78.9594	34.4457
446	m	15	m_15	77.4101	42.519	99.7775	66.3919	34.1321	59.8667	99.1795	100.312	90.9929	30.9754	108.997	64.0623	97.8799	75.7981	27.8286	77.4399	35.9358
456	m	15	m_15	82.0504	41.7081	99.6055	67.9965	35.9834	63.0673	90.6928	100.245	90.7907	22.7552	99.8923	56.1489	94.9497	76.3944	24.6643	80.4577	30.6549
457	m	15	m_15	78.0525	48.9184	99.8845	50.7621	30.2165	60.8787	92.0742	100.394	93.4637	32.5109	98.5133	58.4088	102.481	93.9638	27.8809	91.689	30.4082
460	m	15	m_15	81.5243	40.6419	99.6399	71.5081	38.2314	62.1552	89.4003	99.8849	92.1879	26.6624	96.9762	57.2547	81.0245	78.284	28.719	96.6178	29.7243
467	m	15	m_15	76.3409	42.3022	99.7008	65.9395	29.6929	65.3384	89.2773	100.18	92.3829	15.8963	96.6384	60.4573	95.6526	78.3429	26.7371	81.9036	32.6446
469	m	15	m_15	78.9688	42.4956	99.5466	68.6273	33.8795	65.3318	89.1558	100.361	92.9585	23.1565	95.9092	60.1687	95.5562	78.5967	26.7581	82.2517	32.532
476	m	15	m_15	76.4533	40.4032	99.776	72.7602	36.6147	56.4147	92.2252	99.4109	95.1817	23.8355	96.8938	61.0306	95.2045	75.2798	25.9004	79.0717	32.7556
494	m	15	m_15	77.0062	46.9839	99.9554	54.4997	40.3978	68.3919	88.3236	99.7364	89.5836	25.445	98.5935	62.304	111.21	90.7804	26.3222	81.63	32.2458
503	m	15	m_15	76.2598	40.6535	99.8771	72.1078	35.7123	70.3753	90.6711	99.9924	94.0373	19.8373	96.4204	67.995	99.4012	87.4988	27.8088	88.0259	31.5917
505	m	15	m_15	73.9215	44.296	99.6865	60.8421	43.2685	66.8724	92.5874	100.433	93.9295	24.957	98.5712	63.4729	93.6483	80.949	30.0229	86.4394	34.7329
506	m	15	m_15	81.9212	40.7934	99.5781	71.4567	38.6899	72.4354	91.9537	100.196	96.258	25.9683	95.5284	59.7084	93.9646	73.7255	25.9216	78.4609	33.0376
508	m	15	m_15	75.1902	43.0287	99.4188	66.0475	38.838	66.4388	97.0312	100.609	92.8055	30.5601	104.553	64.3104	99.2314	79.4202	27.8863	80.0354	34.8424
509	m	15	m_15	74.4437	43.6083	99.643	65.8374	42.0306	72.2114	92.2212	100.686	85.5913	23.4647	107.746	61.254	94.2503	83.6033	28.3414	88.7035	31.9507
522	m	15	m_15	81.2503	46.3868	99.859	58.5047	35.1086	64.0993	90.37	99.7025	98.1183	19.7457	92.1031	55.0493	82.1551	82.1669	31.0822	100.014	31.0777
524	m	15	m_15	67.211	42.1321	99.7931	67.9903	41.4105	64.6081	96.3025	100.524	88.9976	25.1487	108.208	62.0102	90.8941	78.5546	28.7435	86.4242	33.2586
525	m	15	m_15	78.3965	43.508	99.9254	64.4221	31.9573	66.84	95.8119	100.524	91.532	24.1149	104.676	58.4185	91.8041	78.5649	27.6858	85.5788	32.3512
526	m	15	m_15	77.765	40.757	99.776	71.3159	35.934	70.809	90.8038	100.295	92.6079	31.2893	98.0519	59.991	89.8214	80.9506	27.2213	90.1239	30.2043
530	m	15	m_15	75.6807	42.6261	99.1257	70.6568	34.3395	61.3299	98.7119	100.456	87.9693	32.8097	112.212	59.2688	90.7313	71.6407	27.8448	78.9592	35.2648
545	m	15	m_15	76.7572	44.9239	99.7769	60.9098	33.3653	57.9167	93.6098	100.033	96.806	24.6751	96.6983	60.7176	91.1762	79.0452	29.9165	86.6951	34.5078
560	m	15	m_15	80.8193	45.3523	99.9822	59.4136	40.8441	57.2987	89.7362	100.412	86.2908	27.1575	103.993	63.3407	97.8877	85.3766	29.3463	87.2189	33.6468
574	m	15	m_15	76.1392	45.3799	99.4165	59.6923	35.388	63.3957	97.9095	100.601	94.0193	29.5846	104.138	60.2085	90.9726	75.5679	30.0338	83.0667	36.1563
582	m	15	m_15	77.7625	44.9042	99.6456	61.4377	38.651	65.7399	88.811	100.101	92.7889	24.1881	95.7129	60.1861	100.39	83.2693	26.921	82.9456	32.4562
586	m	15	m_15	77.6415	40.5333	99.8254	72.5778	35.5978	64.9004	95.2628	100.555	94.0985	23.9633	101.237	63.6134	92.4452	79.0493	27.8918	85.5094	32.6184
588	m	15	m_15	76.3809	43.7227	99.719	65.3859	26.5204	58.4127	86.599	100.577	87.6291	18.7806	98.8245	61.1914	86.9686	82.0389	30.7634	94.3316	32.612
602	m	15	m_15	75.8105	41.8498	99.3772	69.4611	40.3036	68.1297	94.1495	100.543	91.6791	28.6539	102.695	62.8288	85.1497	69.72	30.8794	81.8793	37.7133
611	m	15	m_15	79.5887	42.3411	99.8744	71.0765	29.8964	64.1916	96.0615	100.614	88.5757	22.9252	108.451	59.7101	88.5451	75.6035	28.5526	85.3842	33.4402
613	m	15	m_15	80.5931	45.3303	99.8533	59.9827	32.6663	61.1038	90.5089	100.314	94.901	17.8224	95.3718	56.5238	101.021	84.99	25.3635	84.1311	30.1475
616	m	15	m_15	77.8522	42.7555	99.8307	68.838	32.415	67.1291	95.2258	100.61	93.8011	19.1882	101.519	55.9195	81.2069	71.4314	29.4417	87.9622	33.4708
620	m	15	m_15	74.9417	44.9505	99.9881	59.7866	31.5128	64.6003	88.9758	100.287	91.5417	29.7327	97.197	60.7052	97.8705	90.1735	27.881	92.1355	30.2609
622	m	15	m_15	79.1745	42.921	99.5824	65.4276	40.8537	69.5975	89.9182	99.9969	93.4541	18.9149	96.2164	60.1547	104.791	86.3064	24.6386	82.3605	29.9155
631	m	15	m_15	73.9727	39.3425	99.34	75.8617	43.3034	58.6436	96.0797	100.618	92.3717	27.3071	104.014	61.9395	91.8967	72.176	26.5173	78.5403	33.7627
641	m	15	m_15	75.8318	40.571	99.4798	73.7915	40.2941	65.494	98.9611	100.42	90.4841	24.6606	109.368	61.2259	82.1629	68.3394	30.2326	83.1756	36.3479
642	m	15	m_15	80.7677	41.3153	99.8914	72.224	29.3564	68.7447	87.7327	99.3604	95.9725	23.4098	91.4144	58.259	88.8688	70.7707	27.0847	79.6351	34.011
649	m	15	m_15	80.1791	43.1805	99.9597	65.0291	25.8915	68.8476	95.288	100.531	94.9927	25.8287	100.311	65.3456	97.6299	74.3626	28.9016	76.1679	37.9445
651	m	15	m_15	73.3433	41.8716	99.2557	72.0249	32.607	63.7561	96.7761	100.568	89.5538	25.1874	108.065	64.5027	89.2082	76.9209	30.2756	86.2262	35.1118
002	m	18	m_18	78.9942	40.5465	99.976	74.6808	34.3898	62.5787	93.0674	101.633	97.0237	28.2354	95.9223	60.0775	99.3313	85.5004	24.5233	86.076	28.4903
005	m	18	m_18	77.575	39.0536	99.215	78.2386	34.6366	67.3633	96.9773	102.339	85.5341	31.1602	113.379	62.4505	83.8321	81.1805	29.0928	96.837	30.0431
006	m	18	m_18	87.2216	41.9948	99.9079	69.8018	31.3237	70.5541	90.2432	100.923	98.382	22.7419	91.7274	59.3653	96.5528	83.4584	25.8204	86.4381	29.8716
010	m	18	m_18	76.5075	41.7546	99.4114	68.892	37.0964	59.6285	99.1613	101.516	90.4287	21.0258	109.657	60.7577	91.1623	71.3256	27.8285	78.2402	35.5681
011	m	18	m_18	78.8545	38.0734	99.5081	78.9969	37.1139	69.0611	91.7507	102.298	86.9066	27.3674	105.574	62.825	82.45	79.7151	29.011	96.683	30.0063
015	m	18	m_18	77.1827	37.5495	99.9484	81.0862	33.2847	65.4353	98.056	101.984	92.7784	28.0653	105.688	60.4356	96.0854	68.6944	23.6178	71.4931	33.035
016	m	18	m_18	78.2299	42.6705	99.9789	67.8231	26.2545	70.4342	91.0205	101.472	90.9133	23.6845	100.118	63.5626	99.6238	97.4556	27.2249	97.8236	27.8306
023	m	18	m_18	79.9811	40.7851	99.8488	70.9522	31.6038	66.7284	91.6204	100.493	99.2502	21.7894	92.3126	58.4956	90.4591	70.2192	26.3738	77.6254	33.9757
034	m	18	m_18	79.1833	41.4629	99.9523	73.3279	29.916	64.9307	89.8393	101.916	92.1388	21.7154	97.5043	57.3961	80.8012	86.6994	29.4526	107.3	27.4489
045	m	18	m_18	71.4755	40.3491	99.804	73.292	35.6297	61.9783	100.143	101.714	83.4835	30.2	119.956	66.5968	85.6674	78.2178	31.3669	91.3041	34.3543
054	m	18	m_18	75.211	39.9468	99.3041	77.8179	35.8938	65.3266	96.318	102.043	93.5081	26.2149	103.005	67.5881	91.423	74.9667	29.5323	81.9998	36.015
059	m	18	m_18	78.8658	41.192	99.6191	71.9644	36.9789	67.6813	95.8819	101.752	93.2446	30.5434	102.828	62.2755	104.602	78.3689	24.5239	74.921	32.733
071	m	18	m_18	73.7585	44.5481	99.3027	63.2519	40.8408	68.8984	97.4774	101.797	86.4915	24.4864	112.702	58.1212	96.1784	83.7964	26.9207	87.1261	30.8986
072	m	18	m_18	83.1183	41.134	99.5095	72.8112	36.7952	64.7009	95.403	102.084	90.8533	26.7759	105.008	61.5228	95.7721	96.7926	26.424	101.066	26.1454
076	m	18	m_18	75.4316	45.3715	99.4258	58.9754	33.752	67.3404	88.4866	101.375	93.0166	25.4762	95.1299	60.2323	99.6371	89.5335	27.4278	89.8596	30.523
084	m	18	m_18	75.4868	43.1331	99.8728	65.2754	32.249	66.3514	90.6014	101.18	95.5355	27.6533	94.8354	64.1288	88.6273	83.3315	31.2102	94.0247	33.1936
085	m	18	m_18	81.4429	42.3498	99.7514	67.291	36.6174	62.7579	92.1892	100.842	101.352	28.0966	90.9595	57.7022	95.5114	91.3796	25.5852	95.6741	26.742
086	m	18	m_18	76.7836	35.2558	99.1911	92.4359	28.9598	61.7234	99.7384	101.36	92.1262	18.469	108.263	62.2911	70.5241	55.1401	31.1401	78.1862	39.8281
098	m	18	m_18	76.2917	46.4919	99.4013	58.5132	40.5956	63.6643	92.7426	102.409	88.4397	23.7836	104.865	60.62	108.136	97.6523	26.063	90.3053	28.861
105	m	18	m_18	78.1184	42.7508	99.8677	65.7245	40.6916	70.9023	93.7451	101.983	95.2333	20.8162	98.4374	58.6391	104.083	80.1339	24.0854	76.9906	31.2835
110	m	18	m_18	83.201	42.3193	99.6432	68.9781	35.3787	68.2896	89.0614	100.715	98.3686	20.8785	90.5384	59.698	90.482	88.428	27.9213	97.7299	28.5699
111	m	18	m_18	76.9098	39.0595	99.7802	80.3706	35.6526	67.145	97.8569	101.949	94.5511	28.1192	103.496	67.5564	101.34	72.9041	26.0382	71.9401	36.1943
112	m	18	m_18	69.9164	39.5981	99.9298	76.3694	29.4337	66.1179	90.2464	102.323	84.1895	29.2796	107.194	65.2119	97.6777	87.057	26.4366	89.1268	29.6618
166	m	18	m_18	81.2912	41.5901	99.8673	70.4535	40.5536	64.1206	92.3486	102.011	94.9339	25.904	97.2767	64.1241	90.9934	86.6056	29.309	95.1779	30.7939
169	m	18	m_18	76.5979	40.3101	99.7441	72.2211	35.9842	68.6515	93.2376	101.878	93.4814	34.9068	99.7392	67.4277	86.1123	74.9202	31.5636	87.0029	36.2788
170	m	18	m_18	79.3132	40.9811	99.8441	72.1291	31.8756	70.7117	90.5607	100.286	95.9303	23.3835	94.4025	63.2351	94.0395	82.9189	27.557	88.1745	31.2528
172	m	18	m_18	72.3876	41.41	99.2099	69.4319	33.0951	68.7549	98.427	101.825	88.2133	21.7045	111.578	63.0879	91.249	76.701	28.6301	84.0567	34.0605
173	m	18	m_18	82.2323	42.4182	99.9879	67.5703	33.5345	69.3332	93.5174	101.056	99.6574	26.7543	93.8389	60.2245	100.004	80.4301	25.5451	80.4266	31.7619
197	m	18	m_18	80.6001	40.4679	99.1347	77.1006	35.2665	71.676	93.2539	101.401	94.3865	23.4766	98.8001	61.5347	85.694	74.5308	29.059	86.9731	33.4114
198	m	18	m_18	73.8417	39.2352	99.829	77.1797	33.4522	70.5118	91.4731	101.833	92.126	23.7759	99.2913	65.083	84.5643	81.7602	30.1965	96.6841	31.2321
202	m	18	m_18	70.2844	39.3968	99.7119	76.6361	35.5205	69.557	95.8973	102.197	91.091	28.501	105.276	60.2309	91.4083	81.197	25.9594	88.8289	29.224
204	m	18	m_18	72.1236	44.6005	98.746	62.8313	40.5295	56.9408	99.9022	100.57	84.2926	21.6211	118.518	64.6683	96.1969	95.0308	29.9827	98.7878	30.3506
205	m	18	m_18	73.1078	40.6586	99.1888	72.4971	32.7975	57.4658	94.1364	102.148	90.3624	30.2161	104.176	60.1577	89.9261	78.415	27.1993	87.1994	31.1921
207	m	18	m_18	80.9753	45.7631	99.5473	60.2675	30.135	66.0701	95.3741	101.281	95.146	24.7954	100.24	62.1735	96.0501	81.2319	29.6226	84.5725	35.0263
211	m	18	m_18	77.0799	38.1262	99.8584	80.2226	33.8603	65.537	90.4842	101.515	95.6864	21.3814	94.5633	60.6425	86.6124	78.0379	26.6944	90.1001	29.6275
214	m	18	m_18	76.0404	39.5516	99.7729	78.3446	30.5119	61.8305	91.051	102.216	91.7328	20.1223	99.2567	58.6373	91.586	86.5129	25.3226	94.4608	26.8076
222	m	18	m_18	78.7898	41.8058	99.825	70.7763	31.0836	67.4032	90.0469	100.339	97.535	25.5913	92.3227	63.7119	95.4144	80.9843	27.9154	84.8764	32.8894
229	m	18	m_18	72.5486	40.6822	99.538	73.28	36.2079	67.3452	98.8323	101.609	89.4836	32.9205	110.447	64.0478	85.911	71.4507	30.3291	83.1683	36.4672
239	m	18	m_18	70.6891	43.9145	99.5867	64.4016	33.2586	69.2859	94.327	101.947	85.7882	24.5859	109.953	62.1645	94.0674	95.3343	29.021	101.347	28.6353
241	m	18	m_18	78.8415	42.5643	99.3335	68.0285	37.9561	75.1438	98.7922	101.971	91.2061	25.8047	108.318	61.9424	100.628	79.0627	26.201	78.5696	33.3475
252	m	18	m_18	72.2869	41.2002	98.9958	73.9265	36.0334	66.3497	98.5538	102.095	91.8794	24.183	107.264	63.8167	91.4874	81.1172	28.739	88.6649	32.4131
253	m	18	m_18	78.1066	47.8904	99.8223	54.4555	30.3716	69.0578	92.3195	101.2	99.5248	20.2822	92.7603	58.3946	97.4172	85.471	28.7068	87.7371	32.7192
263	m	18	m_18	79.493	41.4802	99.5558	70.5379	34.0868	58.0251	95.8839	101.571	99.397	23.8328	96.4656	67.7065	89.5862	78.4707	31.3495	87.5924	35.7902
265	m	18	m_18	68.7666	40.0469	99.5842	78.0865	38.4706	65.593	96.3976	102.325	90.5399	27.4849	106.47	61.8134	87.6658	86.6157	28.2372	98.8021	28.5795
268	m	18	m_18	71.3396	46.0992	99.1371	59.5747	36.2381	68.3954	95.7209	102.212	88.8983	23.8756	107.675	60.2956	94.6012	93.8962	29.3821	99.2548	29.6027
278	m	18	m_18	75.4364	44.0279	99.4415	62.114	28.6132	69.631	94.0178	101.918	93.0337	26.0096	101.058	63.5849	112.276	88.6013	24.9341	78.9135	31.5967
279	m	18	m_18	75.3113	39.9037	99.292	77.5198	33.9365	65.8056	99.4003	101.953	93.8168	28.3058	105.951	62.009	72.165	66.0394	34.2879	91.5117	37.4684
281	m	18	m_18	70.7894	39.7549	99.0307	76.7592	43.7337	63.5093	95.3513	102.132	90.4129	27.252	105.462	61.1768	86.8437	74.8405	28.0052	86.1783	32.4968
282	m	18	m_18	73.5874	42.7672	99.5273	67.4559	40.8864	62.956	98.3896	101.965	95.9804	24.1878	102.51	61.4639	100.764	81.0694	26.0872	80.4551	32.4245
285	m	18	m_18	76.6343	38.9743	99.5472	78.4076	25.2137	76.9503	93.5559	101.585	95.5479	27.1292	97.9151	61.9231	87.5242	79.621	27.5742	90.9702	30.3112
286	m	18	m_18	72.208	42.9515	99.5928	68.1444	34.4487	68.4008	95.1206	101.977	93.6402	19.907	101.581	62.9308	103.367	84.7227	26.1493	81.9633	31.9037
289	m	18	m_18	74.2489	36.5515	99.7349	86.2633	41.0188	63.07	91.7006	102.282	88.2274	26.174	103.937	62.2158	75.1003	73.4313	30.2806	97.7776	30.9688
293	m	18	m_18	72.6446	45.9415	98.7445	61.2778	41.9068	69.1915	98.3019	101.804	92.1276	25.0085	106.702	61.733	101.73	77.6282	27.8787	76.3078	36.5345
295	m	18	m_18	74.6905	41.5964	99.8234	70.2322	28.781	59.4508	101.709	100.532	84.0524	29.8715	121.006	66.3085	96.2317	75.0733	28.662	78.0131	36.74
296	m	18	m_18	78.9593	44.1263	99.802	64.1827	33.5191	73.8368	86.3084	100.25	91.6482	26.9834	94.1737	63.2648	93.8503	81.6716	29.7457	87.0233	34.1813
298	m	18	m_18	77.4684	44.8662	99.5336	62.4012	33.6439	64.9166	97.4325	102.002	93.3801	26.2318	104.34	63.3959	109.851	91.368	25.8926	83.1742	31.1305
303	m	18	m_18	75.5286	41.9637	99.9202	71.8124	35.9873	67.5127	90.6892	101.065	97.4397	22.7576	93.0721	63.2493	95.6146	83.3476	27.7591	87.1704	31.8446
320	m	18	m_18	74.6631	44.2978	99.4223	64.4866	33.8076	67.7437	97.1144	101.886	91.7811	25.9917	105.811	66.2454	93.8369	88.6345	31.2726	94.4559	33.1082
323	m	18	m_18	73.898	46.3369	99.1591	59.3446	42.6672	70.0391	95.1555	102.181	91.5733	25.3684	103.912	62.7203	102.05	95.3152	28.4788	93.4005	30.491
324	m	18	m_18	75.0062	42.8964	99.6131	65.5064	37.2931	67.3923	88.6566	101.221	94.2367	24.1854	94.0786	64.0475	93.9723	77.8793	29.2364	82.8747	35.2778
331	m	18	m_18	74.3213	43.5926	99.6736	64.9645	29.7328	66.2298	93.6096	101.958	94.2387	22.1971	99.3324	61.3559	96.6751	75.5336	27.6665	78.1313	35.4102
333	m	18	m_18	83.515	40.8995	99.9381	72.9436	33.4675	69.9573	91.1839	101.758	93.2443	23.7651	97.7904	59.4454	95.123	87.0409	25.5594	91.5035	27.9327
334	m	18	m_18	70.9982	41.2028	99.7536	70.78	34.7633	71.2012	96.2668	102.32	87.3785	31.3896	110.172	63.0054	99.5658	84.5107	26.0732	84.8793	30.7179
354	m	18	m_18	76.825	41.9079	99.6863	69.1838	31.3288	64.5928	94.1034	101.937	92.8326	23.7271	101.369	62.0202	95.4151	79.4356	27.2403	83.2526	32.7201
379	m	18	m_18	76.0882	37.9126	99.8151	80.1132	37.197	69.7752	91.3077	101.19	95.5001	19.5741	95.61	65.4241	94.1733	72.8066	26.3386	77.3113	34.0682
398	m	18	m_18	72.7805	42.8641	99.7288	65.8	37.9876	67.0893	93.331	102.047	91.002	19.8201	102.559	65.4875	98.9655	92.0063	28.364	92.968	30.5094
406	m	18	m_18	81.4874	44.6851	99.9635	62.9565	33.4681	65.7716	90.8691	101.325	95.8441	23.7402	94.8093	62.1383	98.5006	89.66	28.1892	91.0248	30.9687
407	m	18	m_18	74.4321	39.3071	99.5142	78.1518	35.1039	65.4894	86.6197	101.941	91.7429	29.2645	94.4158	63.8134	97.7047	80.4824	25.6724	82.3731	31.1661
410	m	18	m_18	67.1991	41.0887	99.4374	71.8604	42.5861	63.8762	97.8443	102.208	88.3858	24.7316	110.701	63.6812	97.9589	86.7368	26.711	88.544	30.1669
420	m	18	m_18	78.9787	44.911	99.7005	61.9104	33.6642	66.124	96.7844	102.02	95.1347	24.6007	101.734	63.3034	95.7599	87.6485	29.6891	91.5294	32.4366
421	m	18	m_18	76.5318	44.2517	99.1196	62.6439	35.5198	68.2783	91.0423	101.882	93.3908	21.0674	97.4853	59.0258	97.2125	81.0911	26.8689	83.4162	32.2106
427	m	18	m_18	77.2541	38.7058	99.9718	79.8003	37.1943	74.1239	92.4562	101.396	97.048	30.7406	95.2685	62.7753	79.1452	74.6229	30.7002	94.2861	32.5607
428	m	18	m_18	82.8858	44.0646	99.2737	65.3371	29.4378	68.4029	95.4638	101.772	94.651	22.1437	100.859	53.4813	96.9734	87.2465	24.3018	89.9695	27.0112
429	m	18	m_18	76.0708	40.858	99.5653	73.4391	34.3782	69.9658	97.5508	102.048	95.9147	21.2655	101.706	64.9774	93.1907	79.5413	28.4883	85.3533	33.377
434	m	18	m_18	74.7728	40.2875	99.4696	75.8868	31.9319	62.7309	91.6804	101.239	90.7432	24.1831	101.033	63.0605	90.519	74.3041	28.0665	82.0867	34.1913
435	m	18	m_18	69.9504	39.5727	99.9061	76.4397	34.7411	68.3548	97.6409	101.839	94.2926	24.6359	103.551	64.9075	94.4839	81.7982	27.1852	86.5737	31.4012
436	m	18	m_18	80.698	39.3603	99.3636	79.2521	29.7151	69.1906	91.5653	101.947	95.9078	23.9347	95.4722	60.2906	87.1194	75.786	27.2391	86.991	31.3126
437	m	18	m_18	77.2262	39.5805	98.3403	79.0807	48.3318	65.5343	91.9313	102.264	90.1942	24.8828	101.926	63.3101	84.3423	80.2206	29.7104	95.1131	31.2369
439	m	18	m_18	74.2409	44.3467	99.9681	64.235	35.5597	62.9409	96.6539	102.331	88.103	28.9117	109.706	64.0541	98.6846	92.8753	28.7845	94.1132	30.585
441	m	18	m_18	73.5792	42.0229	99.8718	67.7354	32.9759	68.933	94.8127	101.973	94.0188	23.489	100.844	63.6486	86.1854	77.3502	31.0343	89.7486	34.5791
442	m	18	m_18	74.438	38.2335	99.2718	82.6894	41.8281	66.9571	97.0162	102.091	93.217	21.0173	104.076	59.9644	87.1727	72.7173	26.3001	83.4175	31.5282
443	m	18	m_18	71.8119	44.8252	98.9942	62.7015	39.8692	61.1787	96.3032	102.116	90.7482	24.9622	106.121	57.8561	99.7886	80.0885	25.989	80.2582	32.3818
446	m	18	m_18	79.2811	42.1234	99.7829	68.7181	32.8125	69.0746	95.7848	101.78	95.2459	25.3889	100.566	66.8931	98.5539	78.5078	28.5911	79.6597	35.8915
456	m	18	m_18	86.4546	42.2546	99.6808	69.1486	35.6662	63.4932	89.2687	100.492	93.673	19.0807	95.2983	54.6747	92.8751	71.4523	24.8749	76.9337	32.3329
457	m	18	m_18	77.9025	47.9914	99.5044	54.0773	33.4596	67.3453	94.197	102.117	94.8129	31.805	99.3505	59.3921	104.17	94.8775	27.3621	91.0794	30.042
460	m	18	m_18	80.5217	40.2546	99.3282	74.7414	36.324	70.6201	97.1366	101.99	93.721	28.9504	103.644	57.9405	80.9532	71.477	28.8114	88.2943	32.6311
467	m	18	m_18	77.3917	42.5646	99.6469	66.9267	33.301	69.3901	90.4578	101.661	92.6522	21.1226	97.6315	61.7121	97.123	79.31	27.0456	81.6593	33.12
469	m	18	m_18	77.5086	42.5036	99.525	69.1962	33.3773	70.3612	92.6022	102.132	88.9851	25.2733	104.065	60.3487	96.9559	82.9207	26.4557	85.5242	30.9336
476	m	18	m_18	74.4553	40.6391	99.8467	72.4674	36.628	58.0001	97.6733	102.152	95.0338	25.3016	102.777	63.0732	98.0897	79.8802	26.1316	81.4359	32.0885
494	m	18	m_18	79.7924	46.6139	99.9868	57.0483	38.2117	76.2167	91.5916	101.792	89.0265	24.6675	102.881	62.5456	108.688	88.7497	26.8245	81.6555	32.8508
503	m	18	m_18	78.6308	40.0636	99.9601	75.1778	34.9906	70.267	90.9142	101.636	98.6834	21.4814	92.1271	66.9317	96.6402	84.1692	27.7475	87.0955	31.8587
505	m	18	m_18	76.0698	44.3182	99.6903	62.7205	41.6153	74.1348	91.8192	101.853	93.3518	23.8915	98.3583	64.0534	92.8999	80.8757	30.5569	87.0568	35.0999
506	m	18	m_18	82.6772	40.8529	99.688	71.3193	32.6575	70.845	94.9997	101.916	95.9486	22.1483	99.0111	59.6028	90.2989	74.664	26.9654	82.6855	32.612
508	m	18	m_18	77.6021	43.9319	99.373	63.8774	36.4366	66.9808	98.5926	102.038	92.7261	28.5911	106.327	64.6915	99.9575	81.8889	28.4323	81.9237	34.7059
509	m	18	m_18	78.6379	42.2786	99.7244	69.3023	37.0284	70.433	91.7311	102.298	90.1108	25.7148	101.798	61.5024	90.5678	85.6806	28.7104	94.6037	30.348
522	m	18	m_18	84.2451	46.193	99.7867	57.8373	34.9128	73.0833	92.5677	101.186	100.249	21.4748	92.3379	56.1731	83.4118	82.1291	31.1083	98.4623	31.5942
524	m	18	m_18	69.56	41.2413	99.6749	69.0682	39.8287	67.0134	96.4012	102.188	87.976	25.6027	109.577	64.3883	89.7675	86.0913	29.5815	95.9048	30.8447
525	m	18	m_18	80.8501	42.6438	99.9507	66.7985	33.2926	61.9507	94.9675	102.198	91.7904	24.9324	103.461	60.3744	90.6459	85.099	28.4028	93.8807	30.2541
526	m	18	m_18	81.473	41.335	99.7152	70.7606	31.4234	74.3013	100.842	101.933	93.4695	28.0724	107.888	61.209	88.5762	76.3328	28.5639	86.1776	33.1453
530	m	18	m_18	73.5791	42.063	99.171	71.0291	37.9733	64.7534	96.0696	102.28	90.2056	28.1504	106.501	61.5494	90.4574	78.5852	28.6207	86.8753	32.9445
545	m	18	m_18	80.5506	45.0435	99.755	60.6564	34.5936	62.3348	97.039	101.758	96.8333	26.0558	100.212	63.7042	92.5904	81.191	30.9909	87.6884	35.3421
560	m	18	m_18	75.515	44.7683	99.7742	61.6569	43.8892	63.8487	98.006	102.064	85.3683	25.3988	114.804	65.7266	100.114	85.6523	29.3912	85.5547	34.3536
574	m	18	m_18	77.9379	44.5439	99.3905	60.298	36.2604	67.9958	99.9902	101.996	94.9657	29.1052	105.291	60.4648	90.2796	77.5254	29.8332	85.8725	34.7413
582	m	18	m_18	75.1016	45.5082	99.0638	60.6494	42.4631	71.4819	90.823	101.976	87.2362	25.0738	104.112	62.853	105.889	89.3457	27.0124	84.3765	32.0142
586	m	18	m_18	83.5542	39.6651	99.8112	77.0341	34.1759	65.9274	94.274	101.929	94.2164	24.1706	100.061	65.4474	92.1126	82.3222	28.1826	89.3713	31.5343
588	m	18	m_18	78.7452	43.0689	99.6139	65.7884	27.0498	66.1649	85.8425	101.853	90.6539	19.7902	94.6926	60.4565	86.1347	84.6362	30.2293	98.2602	30.7645
602	m	18	m_18	75.4735	41.4722	99.3266	70.9613	42.578	64.3038	89.9969	101.715	92.5785	28.979	97.2114	63.9707	85.9696	78.8744	30.8598	91.7469	33.6358
611	m	18	m_18	74.0378	42.3027	99.7931	71.498	34.3635	67.0493	101.012	101.6	91.7324	25.4045	110.116	61.1799	87.2166	76.0627	29.6741	87.2112	34.0256
613	m	18	m_18	85.1816	45.2087	99.9434	59.3102	35.0632	64.5835	87.5517	101.01	96.7063	21.378	90.5336	57.104	100.415	90.8664	25.7094	90.4912	28.4109
616	m	18	m_18	81.3475	40.9761	99.8255	73.2439	37.1373	74.375	93.2437	102.042	95.8944	19.4475	97.2358	58.1873	85.6602	78.7081	27.8342	91.8841	30.2928
620	m	18	m_18	77.023	44.3993	99.9883	63.6494	29.3535	67.0299	87.7929	101.451	92.2039	21.726	95.2161	63.7789	99.8077	96.1005	28.3719	96.2857	29.4664
622	m	18	m_18	80.3298	42.2862	99.6879	67.4724	38.845	66.5815	90.826	101.642	95.448	22.6423	95.1576	61.4825	106.848	86.3653	24.3323	80.8301	30.103
631	m	18	m_18	80.4618	38.9742	99.6336	77.1223	38.0533	71.4856	96.9248	102.071	95.9912	24.1326	100.973	62.3363	90.6698	73.349	26.7951	80.8968	33.1226
641	m	18	m_18	75.2794	39.5628	99.4685	75.6177	35.3329	69.1283	99.3853	101.59	89.0957	26.2524	111.549	61.7897	79.3589	71.6622	30.804	90.3014	34.1124
642	m	18	m_18	79.3133	41.6036	99.8145	71.5846	31.9712	71.5918	86.9508	101.379	92.6216	23.5869	93.8775	59.1511	89.7586	76.3927	27.4168	85.109	32.2138
649	m	18	m_18	83.048	43.9023	99.9829	64.9955	29.4352	67.7641	91.6217	101.823	94.2606	30.9419	97.2004	65.7208	111.224	87.842	25.9412	78.9773	32.8464
651	m	18	m_18	70.3993	41.2696	99.4374	71.8652	28.3285	66.6719	95.4175	101.901	91.9222	26.3518	103.802	65.8673	89.7987	77.9744	30.2712	86.8324	34.8616
